# Supplementary material for: Unexpected diversity within the extinct elephant birds (Aves: Aepyornithidae) and a new identity for the world's largest bird
Source: PubMed Central journal article supplement (PMC6170582; doi:10.1098/rsos.181295), 2018-09-26
Supplement: rsos181295supp4.pdf [file rsos181295supp4.pdf]

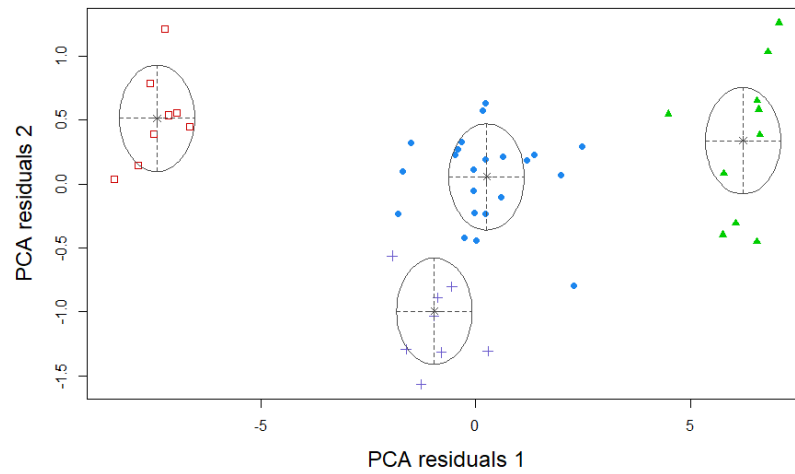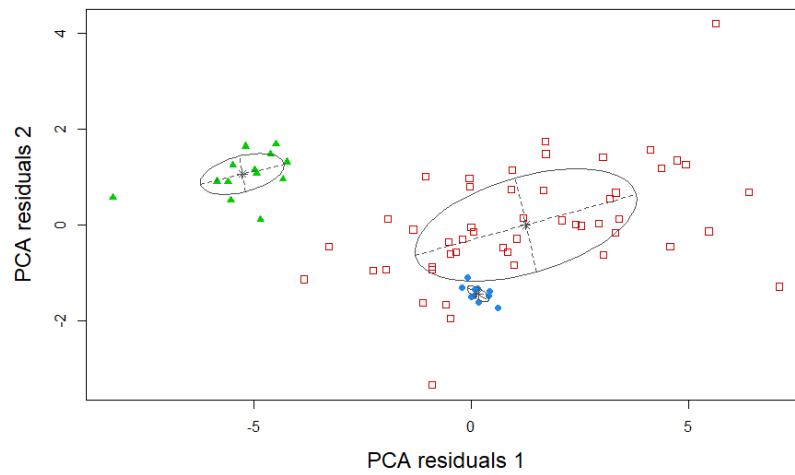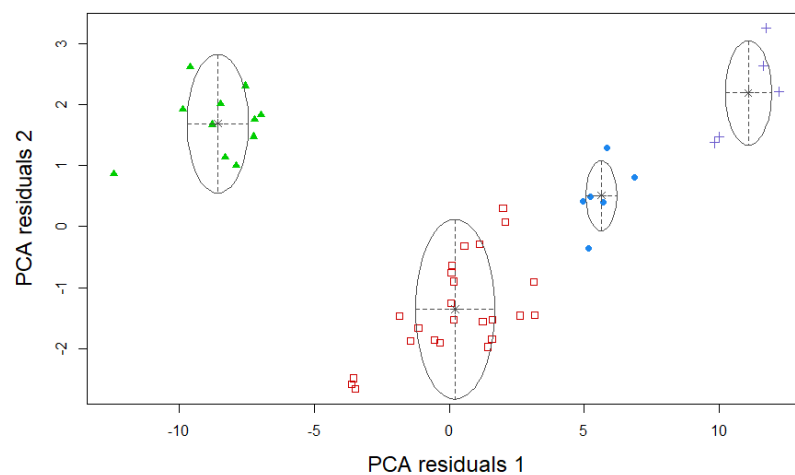

**Supplementary Figure S1. Top**, Unsupervised PCA clusters of log-transformed femoral data, <25% missing data. Axis 1, 91%; Axis 2, 2.1%. **Middle**, Unsupervised PCA clusters of log-transformed tibiotarsal data, <25% missing data. Axis 1, 56%; Axis 2, 7.6%. **Bottom**, Unsupervised PCA clusters of log-transformed tarsometatarsal data, <25% missing data. Axis 1, 85.9%; Axis 2, 6%.
