# Supplementary material for: Unexpected diversity within the extinct elephant birds (Aves: Aepyornithidae) and a new identity for the world's largest bird
Source: R Soc Open Sci. 2018 Sep 26;5(9):181295. doi: 10.1098/rsos.181295 (PMC6170582; doi:10.1098/rsos.181295)
Supplement: TABLE S1. AEPYORNITHID LIMB BONE SPECIMENS AND MEASUREMENTS INCLUDED IN MORPHOMETRIC ANALYSIS [file rsos181295supp1.xlsx]

## Sheet: Sheet1
TABLE S1. AEPYORNITHID LIMB BONE SPECIMENS AND MEASUREMENTS INCLUDED IN MORPHOMETRIC ANALYSIS
A. FEMORAL MEASUREMENTS
Museum	Specimen number	Genus assignment	Species assignment	Original type series	Collection locality	F1	F2	F3	F4	F5	F6	F7	F8	F9	F10	F11	F12	F13	F14	F15	F16	F17	F18	F19	F20
UIO	Unnumbered	Aepyornis	hildebrandti				48.4	185	60.8	161	48.6	49.4		126.46	79.4	88.55	233	278	232	260		117.3	132.29	30.9	15.81
UIO	122.872	Aepyornis	hildebrandti				55.17	204	65.72	174	54.41	51.38	90.59	113.08		99.93			323	267	135.89	127.42	135.21	28.8	17.4
MNHN	1906-16-66	Aepyornis	hildebrandti				54.16	197	63.84	171	55.86	56.54	113.1	131.18	87.82	99.82			302	255	149.68	122.32	148.62	30.06	15.2
MNHN	Unnumbered	Aepyornis	hildebrandti			336	57.34	210	68.6	172	57.32	54.1	112.56	140.26	92.68	105.26	291	304	326	258	148.32	117.82	146.36	30.26	15.7
MNHN	1908-5	Mullerornis	modestus	Aepyornis modestus		255	29.9	121	41.84	112	34.9	34.54	68.54	90.66	55.98	63.66	223		240		96.52	75.88	95.24	23.36	11.66
MNHN	MAD 364	Vorombe	titan		Ankazoabo	445	70.46	267	88.36	234	72.06	72.88	139.22	184	114.82	136.88	381	392	408	325	198	169	143	36.04	27.68
MNHN	MAD 6648	Mullerornis	modestus				32.12	120	40.76	108	32	34.52	64.32	91.6		62.6			253	208	91.4	74.08	89.9		11.3
MNHN	MAD 441	Mullerornis	modestus		Lamboharana		28.44	114	41.52	113	34.12	34.3	63.84	96.4		70.56			241	207	98.38	82.8	94.76	27.76	10.5
MNHN	MAD 373	Aepyornis	hildebrandti	Aepyornis gracilis		325	53.38	172	56.56	180	55.84	55.3	95.76	123.06		85.06	299	309	322	282	129.8	112.84	127.6	20.5	14.88
MNHN	MAD 374	Aepyornis	hildebrandti			317	50.6	189	62.34	164	48.6	51.68		125.4		89.24	245	250	303		128.34		139.54	28.04	12.72
MNHN	MAD 369	Vorombe	titan		Antsirabe	443	73.1	284	94.62	254	72.56	73.34		200		139	386	424		350	199			32.2	24.8
MNHN	MAD 6754	Aepyornis	hildebrandti			322	54.58	190	61.16	175	52.54	50.26		129	83.78	93.88	280	298	305	262	128.1	104.94	141.4	29.92	16.62
MNHN	1906-16-71	Aepyornis	hildebrandti				57.16	203	66.22	152	47.4	46.96	109.3	127.5	89.56	100.6			306	262	134.26	109.16	135.6	29.92	16.02
MNHN	1906-16-65	Aepyornis	hildebrandti			321	53.06	190	60.6	153	49.1	47.8	116.88	130.72	87.8	99.2	278	288	303	246	135.78	110.76	126.84	22.14	17.96
MNHN	Unnumbered	Aepyornis	hildebrandti			312	53.32	199	65.76	171	53.38	49.4	97.5	119.04					297		136.68	124.2	137.56	25.3	18.36
MNHN	JH 32	Mullerornis	modestus			268	32.52	125	41.68	118	36.24	37.24		99.98	57.28	63.18	231	262	245	208	98.12			21.18	9.17
MNHN	JH 58	Aepyornis	hildebrandti			328	55.14	197	64.62	171	55.18	51.34	112.66	138.86	85.92	95.86	282	314	303	268	151.56	147.6	125.94	29.3	16.42
MNHN	JH 59	Aepyornis	hildebrandti				57.04	207	68.92	164	53.64	50.98	107	131.8	88.48	92.72			311	267	138.68	115.28	133.28	34.84	16.7
MNHN	JH 61	Mullerornis	modestus			245	31.42	116	36.8	107	35.34	32.52	71.64	92.02	50.94	63.48	221	228	231	196	87.18	77.34	86.54	18.92	9.48
MNHN	MAD 378	Aepyornis	maximus			358	65.96	237	78.64	185	51.4	58.72	112.46				313	333	342	287	147.88	130.42	143.64
MNHN	Unnumbered	Vorombe	titan			464	71.92	277	93.18	276	69.08	67.12	154	203	126.04	140.34	394	421	419	348	177	158	192	39.26	22.64
MNHN	Unnumbered	Vorombe	titan			490	74.26	288	99.12			69.64	157	207	124.96	142.2	426	445	453	375	183		165	44	19.56
MNHN	MAD 6773	Mullerornis	modestus			264	35.54	125	42.56	114	34.42	35.14	74.22	99.52	57.56	67.04	233	265	245	207	98	80.02	94.14		11.74
MNHN	Unnumbered	Aepyornis	hildebrandti			328	55.1	200	66.08	149	47.28	48.04	107.24	134.72	95.16				312	268	138	134.9	108.14	33.56	18.94
NHMW	2014/0238/039	Aepyornis	hildebrandti			329	57.18	204	65.38	177	53.52	53.82	115.28	126.48	98.3	99.58	309	320	315	269	126.42	104.98	141.24	25.36	14.3
NHMW	2014/0238/041	Aepyornis	hildebrandti			347	57.5	198	64.68	174	55.34	52.72	130.24	130.88		103.14	298	327	324	274	129.02	114.86	146.9	27.28	16.36
NHMW	2014/0238/042	Aepyornis	hildebrandti			326	48.4	188	63.58	166	51.86	52.38		126.68		87.46	281		304			113.32	138.92	20.86	18.92
NHMW	2014/0238/045	Aepyornis	hildebrandti			310	48.88	183	62.68	147	45.88	46.64	101.6	117.68	118.42	82.68	274	287	289	244	121.36	95	129.46	24.38	18.4
NHM	A2142	Vorombe	titan			440	70.96	275	95.12	212	66.3	74.24		187	79.86	118.9	382	421	399	327	187	158	167		26.76
NHM	ii.26.1254	Aepyornis	hildebrandti			316	45.88	173	55.98	154	48.42	47.54	109	122.82	95.72	89.74	263	274	283	244	130.86	101.4	129.1	26.7	17.2
NHM	Unnumbered	Aepyornis	hildebrandti			307	49.58	174	56.2	150	49.94	48.12	140.8	87.3	90.72	92.88	264	282	293	247	133.92	125.86	102.84	24.5	17.2
NHM	A696	Aepyornis	hildebrandti			337	57.54	203	67.5	167	53.76	53.14	118.08	131	128.7	98.88	287	306	306	250	148.96	89.66	144.2	33.6	17.6
NHM	A2141	Vorombe	titan			437	65.64	253	89.4	239	79.22	79.88	181	191	80.22	132.9	381	417	402	340	201	156	200	41.3	24.86
NHM	A465	Aepyornis	hildebrandti				50.44	188	63.64	170	52.56	53.32		124.9					285	245	125.26	126	110	20.7	18.7
CVB	Unnumbered	Vorombe	titan			440	71.2		95.36	231	77.28	76.84	162	182		148.96	374	403	401	328	202	171	210	40.76	20.14
UA	07AEP02	Mullerornis	modestus		Beloha	262	37.56	131	44.14	113	31.26	34.76	78.84	98.74	96.86	56.64	227	234	244	206	90.18	77.42	93.1	23.3	10.7
UA	Unnumbered	Aepyornis	maximus			363	61.42	230	79.52	220	60.98	63.24	135.52		56.68	112.4	312	328	336	290	114	132.24	163	35.94	21.06
UA	Unnumbered	Mullerornis	modestus		Antsirafaly-soalara		35.04	124	42	110	34.9	33.1	74.64	91.72	87.34	64.64				203	89.46	81.6	96.12	22.84	8.4
USNHM	3013	Aepyornis	hildebrandti			317	51.14	192	64	165	54.04	49.24	112.46	125.16	97.4	100.08	285	303	311	265			135.52	28.36	29.18
ZIUU	A49b	Aepyornis	maximus		Ampoza	354	62.36	223	73.5	185	58.88	60.02	122.66	151	86.54	109.96	319	332	332	350	151	132.6	160	26.26	20.86
ZIUU	A15	Aepyornis	hildebrandti		Masinandreina	308	57.42	204	66.24	156	50.66	50.12	112.08	131.92	92.02	96.9	282	284	306	244	131.33	125.78	144.46	29.02	19.56
ZIUU	A49f	Aepyornis	hildebrandti		Masinandreina	322	55.86	200	66.06	168	53	49.86	122.2	135.52	136	91.54	284	301	292	252	132.36	112.36	145.22	28.8	13.66
OUMNH	4950	Vorombe	titan		Antolanbiby	446	94.1	269	66.8	247	77.6	76.7	164			146.9	406	435	415	344	182	165	192	43.2	20
NHM	A439	Vorombe	titan	Aepyornis titan	Itampulu ve		71	271	91.5	232	68.6	74		203		141			414	346				32	24
UIO	122.946	Mullerornis	modestus		Antsirabe		42.1	155	47.65	122	42.79	44.3	89.4								109.2	103.9	110.67
NHMW	2014/0238/038	Aepyornis	hildebrandti		Antsirabe		57.74	199	65.6	163	52.78	50.22	115.04								122.6	107.74	126.88
NHMW	2014/0238/040	Aepyornis	hildebrandti		Antsirabe		48.6	187	63.44		51.92	51.6		132.06		95.4				264	131.24			24.38	18.54
NHMW	2014/0238/044	Aepyornis	hildebrandti		Antsirabe		51	192	63.54	161	51.1	48.62									123.98	109.52	138.96
MfN	MB.AV.73	Mullerornis	modestus	Aepyornis hildebrandti	Antsirabe		43.24	158	52.7												100.4				11.2
CVB	Unnumbered	Vorombe	titan		Ilaka		64.42		85.24																29.58
CVB	Unnumbered	Vorombe	titan		Ilaka		71.08	259	87.52
CVB	Unnumbered	Aepyornis	maximus		Ilaka																				21
USNM	214714	Aepyornis	maximus		Itampolo		69.46	243	81.12					160		110.94								28.56	13.74
ZIUU	20	Aepyornis	hildebrandti		Masinandreina		56.76	196	66.7	169	50	52.2
ZIUU	A16	Aepyornis	maximus		Masinandreina		56.8	208	68.68	203	60.74	58.6		150		107.9								32.88	23.5
ZIUU	A17	Aepyornis	maximus		Masinandreina		60.42	219	73.7	181															21.26
ZIUU	17	Aepyornis	maximus				56.96	210	71.01	190	61.02	56.84													21.9
ZIUU	14	Aepyornis	hildebrandti		Masinandreina		56.28	202	67.24
ZIUU	3	Aepyornis	hildebrandti		Masinandreina		57.66	210	69.86																17.4
ZIUU	5	Aepyornis	maximus		Ampoza		58.92	214	73.92	185		61.9		117.3										30.16	19.24
ZIUU	A44	Vorombe	titan		Masinandreina		70.84	283	99.48															33.1	18.46
ZIUU	A14	Aepyornis	hildebrandti		Masinandreina		53.6	198	65.66	163	51.14	50.74		142.2	89.28	98.84			308	263				28.88	17.24
ZIUU	A43	Aepyornis	maximus		Masinandreina	383	62.66	254	89.64	203	67.64	69.94				118.02	329	358		299				34.38	21.28
MNHN	1910-12-61	Aepyornis	maximus	Aepyornis medius		368	51.26	218	76.82	192	59.18	61.98		167					364	307	151		166	27.36	21.48
B. TIBIOTARSAL MEASUREMENTS
Museum	Specimen number	Genus assignment	Species assignment	Original type series	Collection locality	Tt1	Tt2	Tt3	Tt4	Tt5	Tt6	Tt7	Tt8	Tt9	Tt10	Tt11	Tt12	Tt13	Tt14	Tt16	Tt17	Tt18	Tt19	Tt20	Tt21
NHM	A673	Vorombe	titan			576	34.3	143	51.1	109.7	48.2	54.8	154	90.9	113	39.6	89.7	81.1	104.2	64.5	36.3	30.4	45.4	87.2	320
UIO	A31835	Vorombe	titan			557	50.49	136	33.2	96.96	86.37	72.53	164	90.8	103.39	37.59	34.16	75.62	89.09	64.08	39.9	28.2	67.27	91.57	157
UIO	122.867	Mullerornis	modestus			459	46.13	134	33.18	77.03	74.1	63.84	143.9	67.38	96.89	48.81	41.76	83.38	93.04	45.37	36.92	23.44	68.18	100.83	122.63
UIO	A31833	Mullerornis	modestus			511	49.28	128	31.83	84.79	81.83	64.68	139.27	85.1		58.58	63.88	75.37	78.72			18.22	47.47	92.95	153
UIO	A31836	Vorombe	titan			547	48.43	135	32.19	93.66	84.7	71.84	159	73.9	89.32	41.49	56.47	71.53	98	61.38	32.2	26.45	56.69	87.34	175
UIO	122.878/.879	Vorombe	titan				43.72	122	30.01	94.17	67.73	79.67	151.69	83.01	90.58		71.81	75.69	90.29	35.36	56.05	22.88	38.81	83.92	161
MNHN	Unnumbered	Mullerornis	modestus	Mullerornis agilis	West coast		34.5	98	24.8	72.24	61.06	52.64	117.46	74.86			48.28	51.9	64.08	46.06	25.62	16.38	41.56		107.7
MNHN	Unnumbered	Mullerornis	modestus		Belo sur mer	450	34.9	97	24.14	66.7	57.26	49.86	117.56	74.2		50.62	40.86	64.92	62.72	44.54	31.1	14.5	30.04	70.76	108.08
MNHN	MAD 6733	Aepyornis	sp.			609	56.52	153	33.8	110.72	90.72	25.7	158	110.54		52.2	62.56	78.54	88.2	63.44	37.18	26.28	44.9		180
MNHN	MAD 395	Vorombe	titan			652	55.28	164	41.12	132.21	109.2	89.36	207	115		58.5	71.06	99.58	102.98	76.54	50.04	27.96	68.24	111.88	216
MNHN	[1] 1937-62	Vorombe	titan			767	72.24	199	41.76	152	119.54	104.94	225	114.56		61.36	95	108.5	121.48	90.14	58.44	29.56	57.4	115.3	257
MNHN	[3] 1937-62	Vorombe	titan			656	55.46	161	37.96	142	103.46	86	192	120.38		54.7	89.1	92.52	106.24	75.06	42.56	36.54	63.7	100.98	228
MNHN	[4] 1937-62	Vorombe	titan			671	63	174	39.82	136.86	114.48	96.72		119.88		67.66	77.86	100.44	112.86	82.88	51.6	30.98	78.02		230
MNHN	1906-16-80	Aepyornis	sp.		Antsirabe	554	50.66	137	31.6				158	98.78		53.34	54.06	78.36	88.74	65.16	40.48	27.14	50.4	86.7	171
MNHN	1906-16-77	Aepyornis	sp.			560	48.16	134	30.44	103.68	73.26	87.58	158	94.94	113.8	49.38	66.8	77.1	86.4	63.04	39.76	25.2	44.8	77.38	163
MNHN	1906-16	Aepyornis	sp.		Antsirabe	544	46.26	124	28.2	105.4	82.68	67	130.58	69.22	93.4	45.96	55.1			56.2	33.5	19.3	39.02	70.07	148.6
MNHN	1906-16-82	Aepyornis	sp.		Amtsirabe	572	49.2	136	32.2	106.24	89.2	74.6		77.22	100.54	31.14	65.1	69.82	78.46		28.9	22.5			151
MNHN	1906-16 2	Vorombe	titan			565	55.6	149	31.04	113.76	82.6	76.2		86.3	152	53.92	76.9	82.1	91.7	65.06	37.84	28.68			164
MNHN	MAD 674	Aepyornis	sp.		Antsirabe	571	50.58	139	32.12	102.78	86.7	72.7	154	99.86		41.3	60.96	81.2	90.1	62.92	40.88	30.62		84.32	171
MNHN	1908-5	Vorombe	titan			762	66.52	196	45.1	159	125	107.8	225	131.96		80.16	93.5	117.64	138.64	85.84	58.7	36.8	67.4	126.54	25
MNHN	Unnumbered	Vorombe	titan		Ambolisatra	642	55.76	159	38.16	129.96	99.64	83.06	185	121.04		55.18	90.96	91.86	96.84	73.9	42.52	26.06	52.38	94.58	220
MNHN	1906-16	Aepyornis	sp.		Antsirabe	557	49.34	134	31.24	104.7	89.6	75.2	162	90		38.1	59.44	77.06	85.4	63.46	42.52	25.96	42.84	76.16	148.58
MNHN	MAD 6655	Mullerornis	modestus		Belo sur mer	451	33.18	95	23.78	66.72	58.74	47.36	112.4	76.14		44.28	39.96	59.12	62.24	46.2	26.3	17.22	28.84	67.02	100.7
MNHN	MAD 6747	Mullerornis	modestus		Belo sur mer	441	33.56	94	23.6	64.82	54.76	49.08	119.78	72.3		46.72	47.08	61.2	67.08	39.62	27.44	16.76	35	76.7	93.46
MNHN	MAD 6734	Aepyornis	sp.			628	49.7	142	32.42	113.24	98.06	76.72	178	95.64		41.42	71.48	82.22	90.96	65.28	44.24	28.36	45.92	91.46	146.4
MNHN	MAD 394	Vorombe	titan		Ankazoabo	723	65.1	181	42.88	151.38	116.56	100.3	197	120.74		50.44	95.74	100.62	112.98	83.78	43.38	34.42	73.08	101.4	240
MNHN	MAD 393	Vorombe	titan	Aepyornis ingens		823	67.42	214	52.46			112.94	239	148		71.86	101.34	123.26	139	92.36	54.32	37.36	93.82	127.5	282
MNHN	MAD 459b	Mullerornis	modestus		Beloha	474	34.66	98	23.64	64.76	56.78	47.02	123.54	63		42.62	42.26	55.86	63.62	43.64	29.52	17.92	35.78	82.04	97.88
MNHN	MAD 6744	Mullerornis	modestus			450	32.3	93	23.4	67.16	55.38	50.08	114.14	75.06		48.62	53.42	66.28	70.3	42.46	29.34	16.9	42.72	70.24	102.2
MNHN	MAD 440a	Mullerornis	modestus		Beloha	470	33.96	99	24.7	66.86	58.88	53.86	117.96	76.62		52.7	43.5	70.9	74.76	49.1	30.76	17.4	41.1	80.76	105.5
MNHN	MAD 6653	Mullerornis	modestus	Mullerornis rudis	Belo sur mer	433	32.52	95	23.72	68.58	54.48	47.6	111.9			47.5	35.28			40.46	27.68	18.02	43.02	69.4	106.12
MNHN	MAD 6741	Aepyornis	sp.		Antsirabe	548	47.2	132	31.38	101.7	86.32	68.4	153	95.88		40.78		71.76	83.5	58.28	31.96	25.7		74.62	146.16
MNHN	MAD 6743	Aepyornis	sp.			546	53.36	146	29.02	104.44	93.38	71.52	153	95.04		41.1	78.5	75.2	85.4			22.3		84.08	150
MNHN	Unnumbered	Aepyornis	sp.		Antsirabe	573	46.82	133	30.8	104.54	83.74	72.74	158	91.86			54.1	75.54	83.88	60.84	42.36	27.2	38.54	80.84	148.9
MNHN	Unnumbered	Vorombe	titan			591	51.14	143	34.4	108.76	90.38	79.98	179	109.9		61.58	61.46	88.36	91.36	68.24	42.32	27.86	45.6	88048	183
NHMW	2014/0238/023	Vorombe	titan		Antsirabe	580	48.5	135	60.56	99.24	87.02	72.48	160	100.32		39.42	83.1	75.28	88.6	60.98	42.06	56.78	40.94	79.94	155
NHMW	2014/0238/024	Aepyornis	sp.		Antsirabe	569	48.82	133	3.62	107.48	92.9	76.46	159	98.56		51.48	85.94	76.66	89.4	62.7	40.42	25.92	41.5	79.86	151.5
NHM	A237	Aepyornis	sp.			575	30	137	49.78				167	106.74	116.78	43.76	65.46	79.26	86.32	53.28	39.64	29.2	47.72	84.08	155
NHM	A2143	Vorombe	titan			720	45.3	184	65.6	155	104.02	120.06	219	149.36	153	65.7			114.78	87.82	56.52	34.62	59.54	105.72	254
NHM	Unnumbered	Vorombe	titan			562	31.82	136	49.8	104.3	74.28	93.92	155	109.68	139.38	50.7	62.8	278.84	88.7	57.98	42.34	26.08	55.62	82.88	155
NHM	A464	Mullerornis	modestus			533	43.4	120	28.6	95.64	67.3	82.76	140.24	57.8	88.44	40.62	69.56	74.1	81.44	57.06	35.06	23.72	43.5	70.64	153
NHM	A506	Vorombe	titan			589	31.14	140	51.44	110.56	73.46	93.48	146.68	109.74	153	53.08	71.26	83.02	88.84	70.6	47.28	27.7	47.62	84	153
NHM	A4183b	Vorombe	titan			649	41.56	163	56.16	132.4	82.86	100.8	176	120.3	191	55.4	98.64	93.52	99.54	75.78	45.68	27.54	52.92	96.76	216
NHM	A462	Vorombe	titan			598	37.64	156	54.22	114.16	83.46	101.48	160	116.5	186	62.34		80.34		63.78	41.92	32.56	42.38	89.82	149.96
NHM	A2144	Vorombe	titan			678	45.32	178	60.58	140.62		111.16	150	144.5	191	53.04	95.62	99.5	112.94	92.36	51.22	32.4		101.12	243
NHM	A438	Vorombe	titan			814	73.52	205	56.62	67	101.42	126.62	66	129.12	230	86.42	69.3	114.96	148.88	79.2	50.96	37.56	77.36	148.68
NHM	A673	Aepyornis	sp.			575	50.92	140	31.92	107.14	75.5	88.1	167	90.2	97.6	41.18	88.84	77.58	87.28	65.28	39.72	30.9	60.16	96.3	159
MFN	MB.AV.70	Mullerornis	modestus	Aepyornis hildebrandti	Antsirabe	473	39.32	110	26.76	90.1	59.34	72.7	128.8	85.54	93.92	30.4	65.6	59.16	70.88	53.48	28.02	18.62	43.32	71.6	153
CVB	Unnumbered	Vorombe	titan		Ilaka	614	60.48	165	39.76	129	84.64	100.38	184	96.46	196	55.6	111.86	90.2	105.42	78.94	45.2	30.9	49.74	105	225
UA	08AEP10	Vorombe	titan			549	33.64	144	50.56	112.98	88.36	81.28	166	86.92	148.8	38.86		75.56	79	60.18	40.4	28.64	51.12	89.3	85
UA	08AEP14	Mullerornis	modestus		Beloha	477	24.76	99	34.78	67.48	60.42	49.54	124.92	64.52	101.86	62.18	41.18	60.33	69.38	46.9	26.6	18.88	34.36	84.92	98.1
UA	08AEP15	Mullerornis	modestus		Antsirabe	483	26.54	103	36.54	70.66	56.22	51.8	113.34	59.92	99.46	51.82	58.96	65.54	72.44	40.54	28.36	17.34	40.38	72.02	99.86
UA	08AEP08	Vorombe	titan			609	36.58	164	58.94	134.4	95.85		183	93.3		44.92	84.36	98.34	103.14	72.26	52.56	33.96	57.92	91.9	222
UA	08AEP18	Mullerornis	modestus			463	36.36	102	26.4	67.52	51.06	54.74	113.62	60.42	102.8	47.84	46.34	62.72	102.24	39.4	28.34	42.72	16.68	34.98	69.4
UA	08AEP09	Vorombe	titan		Beloha	557	52.6	151	38.3	119.6	78.3	89.5	174	90.06	161	49.3	88.2	93.96	105.48	67.94	48.02	31.5	60.22	93.06	186
UA	08AEP11	Vorombe	titan			578	57	152	35.08	122.24	79.18	93.06	180	83.58	166	50.7	78.7	84.08	91.78	65.02	38.98	24.56	56.1	88.48	171
UA	08AEP06	Vorombe	titan			646	56.8	165	39.22	142.04	91	110.8		104.96	138.3		90.82	103.86	107.2	87.94	50.8	28.58			200
UA	08AEP07	Vorombe	titan		Beloha	618	57.6	169	38.14	131.86	88.14	105.16		105.78		54.48	88	98.6	102.18	79.28	45.7	31.62	62.36	100.88	194
UA	08AEP16	Mullerornis	modestus		Antsirabe	483	42.42	114	26.48	88.36	57.44	70.3	132.44	66.46	116.92	36.06	54.38	68.82	74.48	58.42	34.66	22.24	38.48	61.38	146.36
UA	Unnumbered	Vorombe	titan		Beloha	618	58.44	162	39.92	131.5		98.84	172	130.26	119	43.3	77.16	99.96	108.52	84.24	50.52	34.96	53.94	102.1	209
USNM	3016	Vorombe	titan			565	27.68	132	50.54	110..42	93.54	78.18	124	97.88	169	42.4	74.06	74.96		63.26	40.4	28.66	41.16	86.14	144
ZIUU	A12	Aepyornis	sp.		Masinandreina	571	50.7	136	29.3	111.2	75.12	88.84	117.04	94.86	153	38.98		76.48		64.68	41.8	28.34	47.26	85.9	163
ZIUU	A49C	Aepyornis	sp.		Masinandreina	581	48.62	130	28.36	106.62	74.1	88.32	136.1	75.36	109.1	46.86		72.46		58.7	32.08	25.46	44.6	79.86	161
ZIUU	40	Aepyornis	sp.		Masinandreina	523	49.8	129	26.56	101.14	70.08	84.74	149.7	83.84	82.74	34.7		74.3		59.94	40.72	29.56	41.34	74.74	139
ZIUU	19	Aepyornis	sp.		Masinandreina	570	50.36	135	30.1	102.54	75	91.34	163	82.78	97.06	52.58		80.72		62.36	41.48	26.56	46.4	83.52	142
ZIUU	A13	Aepyornis	sp.		Masinandreina	564	48.68	133	30.02	104.66	75.96	93.78	155	85.58	99.78	46.88		82.34		62.92	41.08	29.4	45.22	87.12	144.58
ZIUU	12	Aepyornis	sp.		Masinandreina	578	53	139	31.08	107.04	75.18	88.76	156	86.09	101.92	40.16		78.2		61.34	43.8	26.12	45	83.38	140.2
ZIUU	14	Vorombe	titan		Masinandreina	578	50.7	133	27.68	98.2	76.68		154	84.32	105.64	46.34		82.86		62.78	41.34	25.14	47.7	86.94	172
ZIUU	A32	Aepyornis	sp.		Masinandreina	577	50.36	134	30.14	108.76	90.14	77.4	164	91.22	105.56	57.12		82.36		64.16	39.36	33.36	59.94	89.36	150
ZIUU	A31	Aepyornis	sp.		Masinandreina	553	52.36	138	30.74	108.18	87.64	74.18	172	92.1	107.32	59.52		82.2		66.3	43.56	29.24		88.22	149
OUMNH	4952	Mullerornis	modestus		Antolanbiby	478	25.4	99	34.9	72.9	59.5	53.5	128.2	84	84.9	52.6	45.2	70.5	75	48.7	31.9	19.2	36.8	83.5	102.1
OUMNH	4951	Vorombe	titan		Antolanbiby	724	40.2	181	64.9	148.1	112.4	98.6	215	109.5	149.1	58.7	104.7	102.6		73.6	73.3	30.5	65.2		255
NHM	A676	Mullerornis	modestus			435	20.5	85	28.2	61	45.5	51	91	57	65	48	40.8	57.2	59.8	34	28	15.2	25	63	96
MNHN	2	Mullerornis	modestus		Ambolisatra		32	94	25.14	69.4	54.72	47.52	103.24												115.94
MNHN	JH 9	Aepyornis	sp.		Antsirabe								153.48			47.14	81.24	75.68	84.86	58.04	36.94	22.38	43.34	77.28
MNHN	JH10	Aepyornis	sp.		Antsirabe								156.2	89.84		46.4	51.54	77.84	84	36	58.82			82.08
MNHN	JH 19	Aepyornis	sp.		Antsirabe								155.96	96.12		44.54	46.9	77.06	82.4	56.88	34.34	27.24	42.4	75.9
MNHN	1906-16	Aepyornis	sp.		Antsirabe								157.5	100.6		43.44	57.42	72.26	89.92	58	39.78	25.2	52.1	78.26
MNHN	85	Aepyornis	sp.		Antsirabe								152.7	100.8		45.04	83.8	82.74	88.2	58.72	36.34	26.4	40.2	81.68
MNHN	JH 37	Aepyornis	sp.		Antsirabe								157.4	92.4		52.48	35.32	68.3	70.7	54.24	28.78	23.84	46.96	80.64
MNHN	MAD 392	Vorombe	titan		Ankazoabo		71.5	199	47.62	150.68	117.9	104.72						111.06		84.56	51.92				245
MNHN	MAD 396	Vorombe	titan		Ankazoabo		75.3	208	43.06
MNHN	MAD 6656	Mullerornis	modestus		Belo sur mer	451	31.06	89	22.8	67.12	54.54	46.38	114.84	72			44.24	60.92	66.8	44.38	28.44				89.72
MNHN	MAD 6654	Mullerornis	modestus		Belo sur mer		32.62	88	22.06	65.6	52.36	47.8
MNHN	1906-16, 70	Vorombe	titan		Belo sur mer		58.92	171	47.94				192	118.72				93.28		80.36	41.3	32.4			211
NHMW	2014/0238/007	Aepyornis	sp.		Antsirabe		47.94	129	22.08	106.04	84.68	71.24
NHMW	2014/0238/010	Aepyornis	sp.		Antsirabe	478	39.54	122	27.56																132.06
NHMW	2014/0238/011	Vorombe	titan		Antsirabe	538	45.88	132	31.08	99.7		71.6								45.76	63.56				150.18
NHMW	2014/0238/014	Aepyornis	sp.		Antsirabe		49.48	141	32.16																159
NHMW	2014/0238/018	Aepyornis	sp.		Antsirabe								169	109.84		38.48	88.92	80.9	94.48	62.96	42.62	26.66	54.44	85.5
NHMW	2014/0238/020	Aepyornis	sp.		Antsirabe		51.58	141	31.08				146.86			49.52		76		62.66	37.52	26.68	51.1	83.24	140.4
MFN	MB.AV.71	Mullerornis	modestus		Antsirabe					89.22	61.42	72.22
CVB	Unnumbered	Mullerornis	modestus		Ilaka		33.58	101	24.62	61.7	45.98	52.9
UA	08AEP13	Vorombe	titan		Antsirabe	495	26.9	110	40		76.1		114.78
UA	Unnumbered	Mullerornis	modestus		Beloha	468	35.1	101	24.1	71.14	53.42	56.7	120.2	61.32	102.1	50.5	38.6			45.3					98.58
C. TARSOMETATARSAL MEASUREMENTS
Museum	Specimen number	Genus assignment	Species assignment	Original type series	Collection locality	Tmt1	Tmt2	Tmt3	Tmt4	Tmt5	Tmt6	Tmt7	Tmt8	Tmt9	Tmt10	Tmt11	Tmt12	Tmt13	Tmt14	Tmt15	Tmt16	Tmt17	Tmt18	Tmt19	Tmt20	Tmt21	Tmt22	Tmt23	Tmt24	Tmt25	Tmt26	Tmt27	Tmt28	Tmt29	Tmt30	Tmt31	Tmt32	Tmt33	Tmt34	Tmt35	Tmt36	Tmt37	Tmt38	Tmt39	Tmt40	Tmt41	Tmt42	Tmt43	Tmt44
NHM	A2148	Aepyornis	maximus			385	28.8	69.2	54.2	140.2	48.8	54.7	87.8	150.5	108.3	140.1	35.9	54.2	55.5	50.7		65	59.56	65.2	56.24	50.6	53.5	70.6	61.7	54.6	65.1	67.5	53.6	66.1	56.4	51.7	20.2	123.3	33.4	79.62	49.2	45.4	76.9	91.7	120.26	357	372	363	377
UIO	122.861	Aepyornis	hildebrandti			308	25.35	56.52	46.28	109.92	43.5	45.42	60.06	113.98	85.95	109.68	25.4	46.89	38.4	35.38	47.06	48.02	42.44	46.33	43.51	35.49	36.42	52.32	47.04	46.08	50.18	55.6	53.96	43.04	40.6	44.58	13.78	93.43	19.58	63.81	41.98	39.79	57.95	69.25	91.77	297	267	296	295
MNHN	1906-16-65	Aepyornis	maximus	Aepyornis medius		372	31.84	64.78	48.34	125.18	58.6	49.74	79.8	140.3		120.48	33	44.64	44.82		49.76	64.18	58.76	63.4	50.32	47.18	48	55.6	52.94	47.52	55.8	65.1	66.68	43.74	51.14	53.88	18.06	121.64	24.8	79.54	45.1	49	76.46	84.06	117.08	334	356	370	312
MNHN	Unnumbered	Mullerornis	modestus		Belo sur mer	324	18.2	29.6	33.62	72.26	29.16	29.7	42.84	75.88	61.38	70.66	23.64	29.5	26.78	22.9	26.82	33.92	30.2	34.06	28.4	24.2	25.7	34.62	31.3	31.8	46.82	42.92	45.66	26.34	33.2	35.28	10	61.8	11.06	43.96	27.06	26.82	48.26	51.92	65.2	298	313	315	312
MNHN	Unnumbered	Mullerornis	modestus		Belo sur mer	323	16.86	28.5	34.4	79.24	36.34	27.54	38.6	77.64	67.26	74.46	24.6	28.42	27.44	24.82	26.24	36.64	33.3	37.7	29.34	25.24	27.2	33.68	34.3	29.54	43.92	42.86	42.9	28.72	29.5	31.26	12.76	67.4	12.78	39.04	34.2	31.26	46.92	53.84	63.14	300	308	317	312
MNHN	Unnumbered	Aepyornis	hildebrandti			344	23.88	56.62	49.94	114.26	49.56	36.94	65.24	119.36	90.62	108.3	29.9	41.4	44.32	39.28	47.26		47.08	53.72	46.74	40.26	41.68	55.62	48.22	50.34	52.78	62.1	64.26	50.44	51.82	48.14	12.5	104.5	18.02	62.82	50.54	36.7	69.9	75.84	96.34	310	327	324	331
MNHN	Unnumbered	Aepyornis	hildebrandti			325	26.1	57.24	45.24	111.6	49.42	37.88	58.66	113.2	87.04	107.84	31.1	43.94	40.08	35.88	38.98	48.64	44.18	46.78	41.28	37.54	40.44	47.84	47.6	51.34	59.5	51.8	54.78	40.44	43.52	42.12	15.6	101.5		57	41.86	38.9	56.58	72.4	91.3	292	304	307	318
MNHN	1908-5, 51	Vorombe	titan			426	33.8	78.72	62.46	164	64.96	67.98	95.32	173	140.2	161	33.92	54.8	59.08	57.94	64.8	75.64	68.82	76.4	65.86	55.44	62.5	71.7	70.4	61.28	74.6	80.06	82.96	59.14	53.58	62.38	20.28	153.5	30.68	96.2	60.7	58.02		76.54	127	391	400	423	414
MNHN	MAD 6771	Mullerornis	modestus		Ankazoabo	322	15.92	27.82	31.84	74.36	37.42	25.12	32.36	65.82	65.98	74	23.36	26.4		19.7	21.9	32.46	28.36	31.92	25.7					28.92	43.22	42.08	41.22	24.08	28.08	31.36	7.84	56.24	11.76	32.64	23.7					290	311	304	306
MNHN	MAD 6660	Mullerornis	modestus			315	19.6	28.28	37.58	75.8	28.22	30.4	38.26	81.46	64.36	74.62	25.14	31.1	21.28	22.38	27.76	37.02	34.2	37.2	30.1	25.08	25.28	31.98	32.8	33.42	47.5	42.64	44.4	30.26	30.8	32.12	11.94	58.9	13.74	41.58	26.86	27.18	49.06	51.54	65	292	298	298	306
MNHN	MAD 6662	Mullerornis	modestus			303	17.62	30.62	31.3	75.66	33.12	25.74	39.54	69.48	65.94	75.26	22.62	27.82	22.04	20.12	21.32	31.74	28.04	33.7	26.78	24.84	26.36	29.54	30.94	28.4	36.28	39.32	38.94	26.2	26.12	30.4	11.6	56.38	13.42	32.58	19.02	18.2	38.48	49.55	53.76	279	288	287	291
MNHN	MAD 6658	Mullerornis	modestus	Mullerornis rudis	Belo sur mer	297	18.14	30.52	32.42	70.5	30.54	29.48	43.1	72.06	60.58	68.02	22.56	28.46	25.88	24.26	26.94	33.06	29.7	33.66	27.7	23.62	25.42	34.5	32.16	28.74	44.04	41.88	41.96	27.36	29.26	30.22	9.32	61.98	19.92	44.16	30.26	23.56	45.84	52.7	63.34	271	283	286	284
MNHN	MAD 387	Aepyornis	maximus			364	27.04	66.62	49.54	129.98	46.7	54.02	77.58	143.38	109.2	123	32.54	46.48	52.16	45.8	52.82	60.96	50.74	62.18	53.1	46.6	51.12	65.5	60.98	48.16	60.7	64.62	64.72	43.42	52.54	49.22	19.56	133.48	21.14	76.86	52.46	46.52	76.62	91.6	118.26	326	356	372	360
MNHN	MAD 385	Aepyornis	maximus	Aepyornis cursor	Belo sur mer	379	28.74	63.3	52.84	127	46.44	48.76	72.96		118.74	122	36.82	47.88	48.5	46.44	51.68	66.12	59.9	68.02	53.06	45.38	48.32	59.36	55.34	58.1	63.96	71.3	73.44	45.46	53.76	58.86	14.5		28.56	73.2	53.1		72.54	89.62	111.98	353	358	369	381
MNHN	MAD 6736	Aepyornis	hildebrandti			346	29.42	61.18	50.92	116.56	54.44	37.28	69.7	123.08	101.26	109.36	30.86	44.02	40.12	36.52	42.18	51.92	45.64	49.34	43.02	36.58	39.06	53.66	51.38	53.4	61.5	59.68	57.8	42.5	45.02	46.12	13.4	95.5	22.6	61.6	41.86	43.56	60.88	74.66	95.6	305	333	328	334
MNHN	1908-21	Vorombe	titan			486	35.8	87.16	62.68	177	62.88	52.92	91.22	182	153	163	48.9	61.7										76.7	73.52	65.28	80.4	96.16	100.14	56.08	63.68	62.9	15.38	151.94	36.36	88.16	57.12	52.3	73.44	110.66	131.26	440	445	452	454
MNHN	Unnumbered	Aepyornis	hildebrandti			312	25.24	65.04	46.02	115.94	45.88	40.9	45.94	120.8	88	108.62	25.26	46.52	45.76	38.76	44.98	51.92	43.56	50	45.4	38.64	41.36	56.3	53.18	42.46	50.7	55.62	58.76	41.28	49.2	43.94	17.06	100.68	20.18	61.04	43.02	53.24	68.1	72.46	98.14	281	304	311	302
MNHN	Unnumbered	Aepyornis	hildebrandti		Antsirabe	311	23.6	53.78	45.54	113.96	47.44	37.48	56.28	109.72	101.48	114.08	28.22	44.88	38.82	35.04	41.2	49.88	43.88	51.38	40.22	38.24	38.36	47.6	43.9	47.24	54.36	54.28	53.54	41.8	44.9	44.82	14.2	85.46	19.56	57.58	41.1	37.8	55.7	68.92	89.62	281	304	302	304
MNHN	1908-5	Vorombe	titan			419	31.96	76.9	59.86	167	61.56	58.92	74.68	179	139.44	172	35.34	60.68	59.82	54.9	57.34	77.72	69.32	77.24	65.88	58.44	63.8	62	65.32	59.18	68.64	82.44	77.2	54.22	59.14	67.58	14.06	154	26.1	99.7	69.84	57.48	87.02	101.6	134.24	405	380	415	414
MNHN	MAD 382	Vorombe	titan	Aepyornis ingens		466	36.98	81.76	62.14	178	67.84			173	144	173	41.08	60.96	70.86	65.36	65.1	83.12	76.84	85	63.7	59.4	55.24	81.4	67.18	61.48	85.52	85.7	86.26	55.78	64.32	65.5	24.6			92.62	50.78	52.8					437	456
MNHN	MAD 400c	Mullerornis	modestus		Beloha	307	16.56	32	33.88	73.66	27.92	28.08	44.3	72.02	59.92	73.88	23.22	29.44	24.68	23.44	27.86	33.88	28.78	32.06	25.44	22.94	25.72	33.72	29.1	29.24	35.94	39.94	40.18	28.8	29.34	28.08	6.78	55.96	15.38	43.72	25.22	31.42	43.54	50.34	64.14	287	294	301	296
MNHN	MAD 459d	Mullerornis	modestus		Beloha	308	17.7	30.82	32.5	72.7	35.3	29.64	44.68	71.68	61.26	69.76	21.06	27.28	22.2	21.12	23.36	32.16	31.52	34.84	28.16	25.56	26.42	28.16	31.42	27.1	40.86	68.76			27.4	30.08	8.74	59.2	10.24	41.44	22.86	33.6	43.08	50.94	64.54	285	302	304	298
MNHN	Unnumbered	Aepyornis	hildebrandti			314	25.1	61.36		116		55	36.94	47.8	91.02	109.04			42.76	39.14	45.5	51.54			45.18	36.48	42.7	55.56	52.76	45.2	50.72	57.62			46.84	43.96	17.16	98	23.46	64.62	47.46	44.7	71.4	76.2	101.1	275	296	292	306
NHMW	2014/0238/0025	Aepyornis	hildebrandti		Antsirabe	301	27.14	59.42	47.84	118.48	59.2	33.86	62.56	113.14	93.88	109.08	28.9	45.16	40.26	38.36	43.86	54.24	45.98	52.98	52.6	45.82	39.72	54.12	52.48	48.16	52.18	58.02	57.6	42.3	46.8	44.6	16.8	97.8	20.66	56.3	42.28	50.94	65.34	75.68	93.14	268	284	286	296
NHMW	2014/0238/0026	Aepyornis	hildebrandti		Antsirabe	288	24.54	50.5	45.06	105.68	50.86	35.9	52.48	105.68	81.08	99.78	25.8	40.32	39.2	34.54	38.8	46.32	41.34	45.6	39.1	33.84	38.86	51.5	47.48	42	44.44	50.58	50.5	38.38	42.66	40	12.34	90.74	17.42	60.58	38.52	40.34	58.2	65.56	82.76	259	276	278	284
NHMW	2014/0238/0027	Aepyornis	hildebrandti		Antsirabe	329	27.14	52.22	46.9	109.82	47.08	35.04	64.4	109.82	85.28	104.56	21.88	38.6	43.38	37.4	41.9	52.54	45.9	51.34	39.88	35.06	40.4	52.2	49.12	46.34	52.64	54.3	54.78	43.16	47.5	38.98	12.44	91.14	18.54	62.6	45.18	41.3	62.82	69.08	91.54	288	294	299	304
NHMW	2014/0238/0029	Aepyornis	hildebrandti		Antsirabe	291	23.46	50.48	41.44	106.3	40.12	31.64	58.14	105.38	78.14	102.08	25.54	35.64	40.88	35.08	39.18	44.26	38.18	46.08	38.94	32.48	35.74	50.4	44.36	40.18	46.06	52.16	49.48	38.18	42.96	39.58	14.64	93.28	19.78	58.18	40.62	36.72	57.64	62.44	83	279	258	278	286
NHMW	2014/0238/0030	Aepyornis	hildebrandti		Antsirabe	298	25.32	51.54	46	107.5	44.28	34.52	56.3	109.92	86	101.16	26.3	38.64	40.28	35.68	38.9				43.1	35.68	38.26	47.48	47.4	46.32	48.86	55.52	53.02	36.04	41.72	43.14	9.94	91.74	14.82	57.5	44.12	43.08	57.04	65.82	85.56	269	259	274	289
NHMW	2014/0238/0031	Aepyornis	hildebrandti		Antsirabe	309	27.7	52.78	45.2	107.66		39.2	57.54	111.48	85.76	102.82	24.84	39.64	39.32	34.22	38.68	50.18	45.36	49.66	39.42	33.38	38.84	53.12	47.68	47.08	53.32	58.48	57.12	42.38	42.48	40.92	12	94.36	19.18	61.94	44.66	42.94	62.9	70.6	90.72
NHM	A673	Aepyornis	hildebrandti			329	27.4	58.02	48.38	111.16	34.1	69.34	65.9	112.4	88.92	105.46	30.72	48.5	42.18	36.62	44.4	52.62	45.76	51.82	43.86	32.96	35.88	55.44	49.2	48	53.96	57.44	60.7	44.02	40.44	43.96	8.8	98	19.82	62.1	44.14	46.64	65.96	73.88	97.22	291	308	311	309
MNHN	Unnumbered	Aepyornis	hildebrandti			305	25.44	53.7	45.1	108.62	50	63.58	36.8	109.2	88.08	108	26.14	39.4	40.36	36.94	44.32	50.34	42.98	50.96	42.84	36.6	40.4	49.76	53.04	43.88	51.2	58.74	55.2	36.6	42.22	45.7	12.86	92.44	22.84	58.88	44.08	42.8	58.24	67.92	90.96	270	292	296	288
MNHN	Unnumbered	Aepyornis	hildebrandti			302	23.1	51.72	45.14	106.52	47	55.84	32.04	110.24	82.94	104.38	28.62	36.68	40.46	36.68	41.72	50.12	45.48	51.28	40.54	35.1	40	48.04	53.62	35	42.26	55.54	52.48	55.36	42.8	42.48	11.18	92.5	25.16	61.72	42.72	46.16	61.58	68.76	90.16	260	286	288	286
MFN	MB.AV.67	Aepyornis	hildebrandti			266	21.04	42.98	41.42	96.02			51.88	97.12	68.86	96.86		40.7	32.76	31.82	36.02	44.94	40.48	45.6	36.18	31.02	33.8	42.34	40.24	37.44	42.84	45.7	45.14	34.16	41.5	36.8	13.28	80.28	19.16	52.8	38.38					252	237	261	256
USNM	A605209	Aepyornis	maximus		Ilaka	352	34.66	68.18	54.54	134.9	56.24	46.42	71.8	148.66	115.1	134.26	33.06	51.22	49.66	43.66	53.92	65.36	62.1	67.04	53.22	48.9	48.18	64.44	54.26	53.5	60.62	71.2	68.28	47	51.22	52.82	16.8	135.3	28.62		45.94	37.88	72.5	85.8		328			355
UA	07AEP03	Vorombe	titan		Beloha	454	39	81.6	62.26	167	66.1	55.62	91.54	184	131.12	164	39.68	60.58	81.62	73.68	66.68	64.08	70.34	88.12	80.42	89.82	70.04	61.46	65.24	63.34	76.8	87.58	88.82	58	70.64	66.6	20.8	167		90.7	69.2	82.04	93	107.54	137.02	422	447	457	459
UA	08AEP01	Aepyornis	hildebrandti		Antsirabe	270	23.48	44.48	40.2	98.56	42.5	28.74	38.12	99.7	85.02	98.44	23.38	38.96		32.56	37	41.46	36.42	41.58	36.7	31.66	35.6		44.38	41.3		46.6	47.24	33.52	39.46	35.56	12.86	87.46	7.88	55.42	41.9	44.1	55.2	61.8	80.1	255			262
UA	07AEP06	Mullerornis	modestus		Beloha	314	20.3	32.24	34.44	74.74	39.5	24.06	30.78	76.16	65.14	73.9	25.88	30.22	24.86	22.32	24.86	37.22	32.46	38.22	30.96	25.84	29.9	32.2	36.3	29.2		42.1	45.04	26.26	29.14	31.1	11.2	61.16		45.62	31.8		42.7	50.94	64.34	294	301	305	304
UA	07AEP11	Aepyornis	hildebrandti		Antsirabe	269	22.34	44.4	39.24	94.9	46.1	28.84	35.52	99.14	77.36	89.2	25	38.5	34.96			41.9	36.8	41.64	37.68	31.74	35.74	46.72	43.98	39.08	43.16	44.6	46.4	35.78	37.68	37.5	14.6	86.34		55.8	40.56	42.76	54.84	58.56	82.74	242	257	262	265
UA	07AEP08	Mullerornis	modestus		Beloha	312	19.62	29.7	34.16	71.26	31.04	25.54	26.34	72.1	62.32	68.26	21.74	34.22	24.62	27.56		35.06	32.24	36.44	27.44	23.06	24.42		30.16	32.6		42.82	44.36	30.16	30.88	31.6	10.52	61.82		41.08	33.18					298
ZIUU	A34	Aepyornis	hildebrandti		Antsirabe	344	27.9	62.98	49.48	126.4	52.12	39.98	33.34	123.2	109.08	118.01	33.3	49.14	43.78	41.14	48.6	56.56	50.46	55.02	47.38	41.8		60.16		49.24	57.06	66.34	66.08	46.52	44.68	44.92	15.72	102.28	20.68	72.58	49.2	56.43	67.74	79.52	99.92	295	321	329	325
ZIUU	A39	Aepyornis	hildebrandti		Masinandreina	329	27	58.68	45.7	120.3	61.1	32.9	37.56	120.66		118.16	30.2	50.26	47.5	42.42	47.96	58.94	50.3	52.76	46.5	39.18	44.58	61.34	56.74	55.74	60.24	66.36	64.24	48.98	53.64	47.32	18.68	100.14	20.76	65.16	52.5	56.74	67.94	75.94	101.94	294	316	317	322
ZIUU	A38	Aepyornis	hildebrandti		Masinandreina	327	26.58	60.88	49.42	123.74	56.58	34.78	37.54	125.04	101.16	123.44	30.92	47.4	45.76	41.56	44.5	54.08	46.06	53.56	45.72	39.46	43.76	58.48	52.64	50.48	57	61.98	61.04	45.04	51.06	46.66	24.94	110.02	20.6	67.1	44.56	50.64	62.8	74.68	98.96	287	314	301	323
ZIUU	A40	Aepyornis	hildebrandti		Masinandreina	325	26.88	55.36	44.58	117.26	59.86	34.48	34.96	114.48	110.6	114.06	29.78	45.81	43.02	37.66	45.01	52.4	45.58	51.06	44.74	36.2	39.08	54.26	50.38	56.16	49.4	61.18	58.4	44.3	48.88	46.12		98.08								284	294	308	312
ZIUU	A33a	Aepyornis	hildebrandti		Masinandreina	305	26.76	55.34	39.212	113.98	43.64	37.68	24.54	112.46	95.26	110.82	28.16	41.38	40.38	36.96	42.14	47.68	42.8	48.54	39.02	36.54	38.88	49.1	51.24	43.96	48.52	53.32	51.78	39.2	40	44.98	14	88.2	19.78	62.42	43	48.84	58.46	62.6	90.72	274	277	285	300
NHM	A676	Mullerornis	modestus			271	15	27	27.2	65	28	24		65.8	54	64	17.6	27	23	20	24	30	29	26.2	29.5	22	19	20	23	24.6	35	34	24	20.5	27	26.8				41	29	25.2	40.2	44	56	288	261	263	265
MNHN	MAD 6770	Aepyornis	maximus		Ankazoabo		28.06	73.3			45.6																										22.4	121.8	33.3
MNHN	MAD 383	Aepyornis	maximus		Belo sur mer		43.6	81.1	63		58.14											71.7	72.8	69.9						69.96	83.6	64	69.7	56.7			24.9
MNHN	MAD 6659	Mullerornis	modestus		Ambolisatra	314	18.08	30.28	33.28	75.14	27.86				62.06	73.2	26.7	27.34					32.18	34.5				25.22		27.02	38.6	39.1	40.36	26.06	28.76	28.74	14.3		17.78
MNHN	MAD 384	Aepyornis	hildebrandti		Antsirabe	295	23.5	50.84	42.18		43.1	38.14	59.32	107.74			30.14	37.26				47.2	40.88	47	41.46	34.4	37.66		47.22				54.36	41.24		42.12	11.58	100.04	19.3	57.04	44.66	38.16	54.3	67.9	82.04		281		292
MNHN	MAD 388	Aepyornis	maximus	Aepyornis lentus	Belo sur mer	363	28.96	67.32	45.82		48.5	44.96	56.32				28.96	39.8												51.1	60.06						22.8
MNHN	MAD 8813	Aepyornis	maximus		Belo sur mer	536	32.58	88.06			52.58		85.8	165																							35.06
NHMW	2014/0238/0028	Aepyornis	hildebrandti		Antsirabe	309	23.04	50.6			52.6																												21.2
NHMW	2014/0238/0032	Aepyornis	sp.		Antsirabe	318	24.88	52.34	39.2		51.38						27.08	37.1																				19.92		20.68
NHMW	2014/0238/0033	Aepyornis	maximus		Antsirabe						55.52	40.8	38.68	125.8																									101.86		63.1	48.74	62.36	73.7	97.32
NHMW	2014/0238/0034	Aepyornis	hildebrandti		Antsirabe		23.6	52.72	49.1	118.2	46.4				95.98	109.3	28.9	41.68	40.54	37.3	43.08	53.9	46.16	51.82	46.38	40.64	44.02	53.74	52.92	47.92	52.86	58.2	57.04	38.52	44.68	51.08	17.78
NHMW	2014/0238/0035	Aepyornis	hildebrandti		Antsirabe	323	25.44	59.96	43.32	113.2	44.56				92.92	95.98	28.34	39.22																			16.54
NHMW	2014/0238/0036	Aepyornis	hildebrandti									36.7	50.86	122.42																								103.64	23.96	70.5	47.52	44.26	67.04	78.48	102.6
UA	07AEP04	Aepyornis	maximus		Beloha	423	37.64	82.6	52.8	149.06	58.16	55.7	64.8	168																								145.3		87.82	70.98	69.32	84.6	101.18	132.5
UA	08AEP13	Aepyornis	maximus		Ambararata-Mahabo		43.74	85.78	62.8	167	59.92	53			150	165	40.78	60.6	63.73	57.86	62.52	84.2	72.8	83.62	67.08	59.36	66.48	81.6	73.8	62.54		80.68	81.7	55.6	66.36	68.38
UA	07AEP12	Aepyornis	maximus		Antsirabe		30.26	65.1			50.2			127.38																								107.32
UA	07AEP07	Mullerornis	modestus		Belo sur mer	306	19.5	31.98			32.18	30.16	27.66	79.24	66.48				28.52	27.7	31.02	34.16	33.02					36.68	38.1	33.08	42.84				31.44	33.94	10.94	64.8		79.94	36.76	33.8			54.2	287	289	300	294
UA	07AEP05	Aepyornis	maximus		Beloha	361	29.02	68.38	51.92	132.8	50.2		50.04				30.06	50.24		49.9	51.6	60.8	57.02	67.18	50.2	46.5				68.62	61.5	53.7		45.6	49.58	53.56	16.42	132.54
UA	Unnumbered	Aepyornis	maximus		Beloha	359	30.7	69.8
USNM	214709	Mullerornis	modestus		Itampolo	287	16.88	27.68	31.12	70.8	31.04	27.16	34.08		62.2	69.82	21.9	30.76	27.24	29.44	28.24	29.42	38.82	35.04	40.8	30.8	28.3	30.62	33.76	29.66	43.82														54.84	264	273	272	282
USNM	214713	Aepyornis	maximus		Itampolo	274	35.14	73.58	51.6	149.68	68.8	50.48	87.22		136	148	35.42	50.2	55.6				65.66															139.66
ZIUU	"13"	Aepyornis	hildebrandti		Masinandreina		25.54	56			46.98															40.38	43.98	52.7
ZIUU	A36	Aepyornis	hildebrandti		Masinandreina		28.4	59.6	42.52	122.52						115.2	29.1	51.08	40.08	38.5			47.7	58.02		38.82	43.58		53.3	51.44	60.34	62.68	61.22	44.7	45.64	44.16	16.92
ZIUU	"17"	Aepyornis	hildebrandti		Masinandreina		28.4	54.36		110.08	51.04				91.36	110.76			39.66	36.42	42.94	51.88	48.8		42.74	35.42	40.02	52.8	48.84	46.3	48.78	59.3			44.92	43.44	27.78		22.22
ZIUU	A47	Aepyornis	maximus		Ampoza	400	35.12	79.9	60.76								41.32	57.7
