# Supplementary material for: Unexpected diversity within the extinct elephant birds (Aves: Aepyornithidae) and a new identity for the world's largest bird
Source: R Soc Open Sci. 2018 Sep 26;5(9):181295. doi: 10.1098/rsos.181295 (PMC6170582; doi:10.1098/rsos.181295)
Supplement: TABLE S2. PCA LOADINGS AND EIGENVALUES FOR MORPHOMETRIC ANALYSES [file rsos181295supp2.xlsx]

## Sheet: Sheet1
TABLE S2. PCA LOADINGS AND EIGENVALUES FOR MORPHOMETRIC ANALYSES
A. Unsupervised clusters of femora, <25% missing data
Measurement number	PC1 loadings	PC2 loadings		Museum	Specimen number	PC1 eigenvalues	PC2 eigenvalues
F1	0.985719	-0.0453912		UIO	Unnumbered	-2.05113	-0.219623
F2	0.947256	-0.0677659		UIO	122.872	-0.513512	0.137267
F3	0.98287	0.0181816		MNHN	1906-16-66	-0.172591	-0.442755
F4	0.953715	0.0808986		MNHN	Unnumbered	0.18641	-0.426297
F5	0.973461	-0.0320433		MNHN	1908-5	-6.67501	-0.178671
F6	0.976961	-0.00769426		MNHN	MAD 364	6.18404	1.13569
F7	0.978117	0.0207734		MNHN	MAD 6648	-6.99425	-0.0291252
F8	0.946171	-0.00136069		MNHN	MAD 441	-6.52268	-0.673989
F9	0.966498	-0.063605		MNHN	MAD 373	-1.25752	0.240949
F10	0.985849	-0.0123454		MNHN	MAD 374	-1.87372	-0.625349
F11	0.98249	-0.0288013		MNHN	MAD 369	7.25619	0.61216
F12	0.978364	-0.0226522		MNHN	MAD 6754	-0.97104	-0.314948
F13	0.976876	-0.0300486		MNHN	1906-16-58	0.940305	-0.297937
F14	0.970774	-0.0205752		MNHN	1906-16-71	-0.871846	-0.309892
F15	0.962403	0.0113241		MNHN	1906-16-65	-1.38749	0.670926
F16	0.95734	0.0635187		MNHN	Unnumbered	-0.957381	0.583685
F17	0.939813	0.105459		MNHN	Unnumbered	-6.15447	-0.487354
F18	0.92614	-0.116637		MNHN	Unnumbered	4.5222	-0.023525
F19	0.835742	-0.325219		MNHN	Unnumbered	-0.197822	0.104273
F20	0.812738	0.511878		MNHN	Unnumbered	-0.253348	-0.519401
				MNHN	Unnumbered	-7.26475	-0.201205
				MNHN	MAD 378	1.55221	0.062674
				MNHN	Unnumbered	7.20644	-0.521238
				MNHN	Unnumbered	8.03953	-1.17663
				MNHN	MAD 6773	-6.11006	-0.136447
				MNHN	Unnumbered	-0.329018	0.607302
				MNHN	Unnumbered	-0.508553	0.209959
				NHMW	2014/0238/039	-0.498505	-0.372898
				NHMW	2014/0238/041	0.143747	-0.215852
				NHMW	2014/0238/042	-1.28108	0.932648
				NHMW	2014/0238/045	-2.29516	0.567104
				NHM	Unnumbered	0.765992	-0.253271
				NHM	A2142	6.20381	0.726254
				NHM	ii.26.1254	-2.17898	0.20286
				NHM	Unnumbered	-1.8633	0.748944
				NHM	A696	-0.265259	-0.486177
				NHM	A2141	7.32577	-0.132481
				NHM	A465	-1.60563	1.14878
				CVB	Unnumbered	7.28521	-0.79944
				UA	07AEP02	-6.38976	-0.396402
				UA	Unnumbered	2.24678	-0.200011
				UA	Unnumbered	-6.81273	-0.68264
				USNM	3013	-0.276386	2.06015
				ZIUU	A49b	1.96278	0.673289
				ZIUU	A15	-0.699905	0.403264
				ZIUU	A49f	-0.757474	-0.66069
				OUMNH	4950	7.63736	-1.53017
				NHM	A439	6.53157	0.486246
B. Supervised clusters of femora (four possible groups only), <25% missing data
Measurement number	PC1 loadings	PC2 loadings		Museum	Specimen number	PC1 eigenvalues	PC2 eigenvalues
F1	0.985719	-0.0453912		UIO	Unnumbered	-2.05113	-0.219623
F2	0.947256	-0.0677659		UIO	122.872	-0.513512	0.137267
F3	0.98287	0.0181816		MNHN	1906-16-66	-0.172591	-0.442755
F4	0.953715	0.0808986		MNHN	Unnumbered	0.18641	-0.426297
F5	0.973461	-0.0320433		MNHN	1908-5	-6.67501	-0.178671
F6	0.976961	-0.00769426		MNHN	MAD 364	6.18404	1.13569
F7	0.978117	0.0207734		MNHN	MAD 6648	-6.99425	-0.0291252
F8	0.946171	-0.00136069		MNHN	MAD 441	-6.52268	-0.673989
F9	0.966498	-0.063605		MNHN	MAD 373	-1.25752	0.240949
F10	0.985849	-0.0123454		MNHN	MAD 374	-1.87372	-0.625349
F11	0.98249	-0.0288013		MNHN	MAD 369	7.25619	0.61216
F12	0.978364	-0.0226522		MNHN	MAD 6754	-0.97104	-0.314948
F13	0.976876	-0.0300486		MNHN	1906-16-58	0.940305	-0.297937
F14	0.970774	-0.0205752		MNHN	1906-16-71	-0.871846	-0.309892
F15	0.962403	0.0113241		MNHN	1906-16-65	-1.38749	0.670926
F16	0.95734	0.0635187		MNHN	Unnumbered	-0.957381	0.583685
F17	0.939813	0.105459		MNHN	Unnumbered	-6.15447	-0.487354
F18	0.92614	-0.116637		MNHN	Unnumbered	4.5222	-0.023525
F19	0.835742	-0.325219		MNHN	Unnumbered	-0.197822	0.104273
F20	0.812738	0.511878		MNHN	Unnumbered	-0.253348	-0.519401
				MNHN	Unnumbered	-7.26475	-0.201205
				MNHN	MAD 378	1.55221	0.062674
				MNHN	Unnumbered	7.20644	-0.521238
				MNHN	Unnumbered	8.03953	-1.17663
				MNHN	MAD 6773	-6.11006	-0.136447
				MNHN	Unnumbered	-0.329018	0.607302
				MNHN	Unnumbered	-0.508553	0.209959
				NHMW	2014/0238/039	-0.498505	-0.372898
				NHMW	2014/0238/041	0.143747	-0.215852
				NHMW	2014/0238/042	-1.28108	0.932648
				NHMW	2014/0238/045	-2.29516	0.567104
				NHM	Unnumbered	0.765992	-0.253271
				NHM	A2142	6.20381	0.726254
				NHM	ii.26.1254	-2.17898	0.20286
				NHM	Unnumbered	-1.8633	0.748944
				NHM	A696	-0.265259	-0.486177
				NHM	A2141	7.32577	-0.132481
				NHM	A465	-1.60563	1.14878
				CVB	Unnumbered	7.28521	-0.79944
				UA	07AEP02	-6.38976	-0.396402
				UA	Unnumbered	2.24678	-0.200011
				UA	Unnumbered	-6.81273	-0.68264
				USNM	3013	-0.276386	2.06015
				ZIUU	A49b	1.96278	0.673289
				ZIUU	A15	-0.699905	0.403264
				ZIUU	A49f	-0.757474	-0.66069
				OUMNH	4950	7.63736	-1.53017
				NHM	A439	6.53157	0.486246
C. Unsupervised clusters of femora, >25% missing data
Measurement number	PC1 loadings	PC2 loadings		Museum	Specimen number	PC1 eigenvalues	PC2 eigenvalues
F1	0.988758	-0.0396515		UIO	Unnumbered	-2.45994	-0.290737
F2	0.939326	-0.129879		UIO	122.872	-0.829742	0.0401554
F3	0.981905	-0.0186231		MNHN	1906-16-66	-0.454732	-0.508243
F4	0.950754	0.0306339		MNHN	Unnumbered	-0.0831454	-0.528392
F5	0.97533	-0.0197065		MNHN	1908-5	-7.37389	-0.0857437
F6	0.979889	0.00286661		MNHN	MAD 364	6.28607	1.03325
F7	0.977821	0.0295205		MNHN	MAD 6648	-7.72175	0.0484265
F8	0.954183	0.00802323		MNHN	MAD 441	-7.19071	-0.597893
F9	0.963602	-0.0482986		MNHN	MAD 373	-1.63768	0.251478
F10	0.988293	-0.0137423		MNHN	MAD 374	-2.26643	-0.704017
F11	0.985842	-0.0205876		MNHN	MAD 369	7.43735	0.524263
F12	0.981595	-0.0191898		MNHN	MAD 6754	-1.30956	-0.332835
F13	0.981235	-0.0244975		MNHN	1906-16-71	-1.20225	-0.437172
F14	0.976509	-0.00208699		MNHN	1906-16-65	-1.77602	0.65349
F15	0.968137	0.0196956		MNHN	Unnumbered	-1.3088	0.523408
F16	0.962437	0.0532672		MNHN	JH 32	-6.82194	-0.433827
F17	0.952044	0.073118		MNHN	JH 58	-0.489348	-0.0321009
F18	0.935207	-0.077383		MNHN	JH 59	-0.535093	-0.657067
F19	0.845456	-0.292399		MNHN	JH 61	-8.01493	-0.13638
F20	0.806623	0.539557		MNHN	MAD 378	1.32915	-0.0832593
				MNHN	Unnumbered	7.39399	-0.606091
				MNHN	Unnumbered	8.30089	-1.40308
				MNHN	MAD 6773	-6.78794	-0.0737869
				MNHN	Unnumbered	-0.809559	0.0596079
				NHMW	2014/0238/039	-0.820303	-0.454128
				NHMW	2014/0238/041	-0.127519	-0.249514
				NHMW	2014/0238/042	-1.68006	0.986212
				NHMW	2014/0238/045	-2.74225	0.580709
				NHM	A2142	6.26974	0.695478
				NHM	ii.26.1254	-2.60326	0.261687
				NHM	Unnumbered	-2.26439	0.696963
				NHM	A696	-0.557852	-0.540126
				NHM	A2141	7.52759	-0.0723755
				NHM	A465	-2.01674	1.10421
				CVB	Unnumbered	7.49274	-0.953124
				UA	07AEP02	-7.0794	-0.403392
				UA	Unnumbered	2.11572	-0.245005
				UA	Unnumbered	-7.50792	-0.699551
				USNM	3013	-0.597506	2.22372
				ZIUU	A49b	1.79003	0.646322
				ZIUU	A15	-1.03204	0.325662
				ZIUU	A49f	-1.08397	-0.779404
				OUMNH	4950	7.89475	-1.72123
				NHM	A439	6.64105	0.424973
				UIO	122.946	-4.74274	0.0578906
				NHMW	2014/0238/038	-1.2041	-0.125346
				NHMW	2014/0238/040	-1.44687	0.64965
				NHMW	2014/0238/044	-1.61142	-0.071508
				Berlin	MB.AV.73	-5.25862	-0.430146
				CVB	Unnumbered	6.37888	1.20241
				CVB	Unnumbered	5.4115	-0.0139747
				CVB	Unnumbered	3.02938	0.0699518
				USNM	214714	2.06855	-0.978317
				ZIUU	20	-0.705982	-0.0496704
				ZIUU	A16	1.83682	0.637422
				ZIUU	A17	1.67633	0.331549
				ZIUU	17	1.46113	0.511924
				ZIUU	14	-0.0652819	-0.01597
				ZIUU	3	0.371072	-0.17636
				ZIUU	5	0.805331	0.184182
				ZIUU	A44	5.58119	-0.569493
				ZIUU	A14	-0.803765	-0.0684156
				ZIUU	A43	3.81882	0.055996
				MNHN	1910-12-61	2.10735	0.746669
D. Unsupervised clusters of tibiotarsi, <25% missing data
Measurement number	PC1 loadings	PC2 loadings		Museum	Specimen number	PC1 eigenvalues	PC2 eigenvalues
Tt1	0.94662	0.027443		NHM	A673	0.124053	-0.546733
Tt2	0.724754	-0.336303		UIO	A31835	-0.699365	-0.381296
Tt3	0.98311	-0.019111		UIO	122.867	-2.19215	0.273344
Tt4	0.67469	0.432848		UIO	A31833	-1.36494	0.738446
Tt5	-0.264775	0.49836		UIO	A31836	-1.11552	-0.707031
Tt6	0.813384	-0.166168		UIO	122.878/.879	-1.45662	0.18987
Tt7	0.853486	0.0492264		MNHN	Unnumbered	-4.4252	0.971467
Tt8	0.739041	-0.390676		MNHN	Unnumbered	-5.10327	0.956528
Tt9	0.871944	0.135259		MNHN	MAD 6733	-0.120842	-0.657734
Tt10	0.51241	0.564967		MNHN	MAD 395	3.5158	-0.510828
Tt11	0.539318	0.476525		MNHN	[1] 1937-62	6.27007	-1.05667
Tt12	0.804981	-0.159654		MNHN	[3] 1937-62	3.43198	-0.631223
Tt13	0.528609	0.167257		MNHN	[4] 1937-62	4.56098	0.112708
Tt14	0.880202	0.0864209		MNHN	1906-16-80	-0.0119805	-0.775416
Tt15	0.930787	-0.0981365		MNHN	1906-16-77	-0.405567	-0.995115
Tt16	0.864506	0.0247758		MNHN	1906-16	-2.17354	-1.10486
Tt17	0.693396	-0.00440146		MNHN	1906-16-82	-1.41519	-2.0587
Tt18	0.792773	-0.0426242		MNHN	1906-16 2	0.405555	-0.10342
Tt19	0.0458908	-0.0977744		MNHN	MAD 674	0.0350182	-1.1842
Tt20	0.700119	-0.186834		MNHN	1908-5	6.47858	0.872549
				MNHN	Unnumbered	2.56869	-0.665213
				MNHN	1906-16	-0.585937	-1.28394
				MNHN	MAD 6655	-5.41953	0.782074
				MNHN	MAD 6747	-5.28254	0.783078
				MNHN	MAD 6734	0.567829	-1.05686
				MNHN	MAD 394	5.06721	-1.03588
				MNHN	MAD 393	8.51939	-0.789994
				MNHN	MAD 459b	-5.20091	0.427454
				MNHN	MAD 6744	-4.79917	0.991154
				MNHN	MAD 440a	-4.26316	1.13933
				MNHN	MAD 6653	-4.51663	1.45057
				MNHN	MAD 6741	-0.95853	-1.25505
				MNHN	MAD 6743	-0.188604	-1.49647
				MNHN	Unnumbered	-0.724734	-0.653457
				MNHN	Unnumbered	1.14688	-0.973114
				NHMW	2014/0238/023	1.04235	0.813623
				NHMW	2014/0238/024	-0.378427	-1.61235
				NHM	A237	-0.251745	-0.226146
				NHM	A2143	5.91718	1.47593
				NHM	Unnumbered	1.39431	1.74899
				NHM	A464	-2.4347	-0.444887
				NHM	A506	0.776401	1.4302
				NHM	A4183b	3.26612	1.67671
				NHM	A462	1.61086	2.29349
				NHM	A2144	4.71923	2.08276
				NHM	A438	6.7015	4.89582
				NHM	A673	0.375352	-1.75823
				MFN	MB.AV.70	-3.68639	-0.561883
				CVB	Unnumbered	3.4536	0.312616
				UA	08AEP10	-0.462295	0.458456
				UA	08AEP14	-4.81242	1.56371
				UA	08AEP15	-4.72993	1.24202
				UA	08AEP08	2.5074	0.152226
				UA	08AEP18	-4.4234	0.941053
				UA	08AEP09	1.89613	0.0337088
				UA	08AEP11	1.00583	-0.0899039
				UA	08AEP06	3.14309	-0.00643039
				UA	08AEP07	2.85824	-0.233976
				UA	08AEP16	-3.36593	-0.0189154
				UA	Unnumbered	3.06194	-0.69102
				USNM	3016	-0.21729	1.31192
				ZIUU	A12	-0.256886	-0.0777383
				ZIUU	A49C	-1.10831	-0.963119
				ZIUU	40	-1.26175	-2.21223
				ZIUU	19	-0.248221	-1.28279
				ZIUU	A13	-0.31865	-1.21
				ZIUU	12	-0.384449	-1.41726
				ZIUU	14	-0.641428	-0.173022
				ZIUU	A32	0.449765	-0.839055
				ZIUU	A31	0.337937	-0.808155
				OUMNH	4952	-4.29582	1.10073
				OUMNH	4951	5.40122	0.715569
				OUMNH	A676	-6.90856	0.612224
E. Unsupervised clusters of tibiotarsi, >25% missing data
Measurement number	PC1 loadings	PC2 loadings		Museum	Specimen number	PC1 eigenvalues	PC2 eigenvalues
Tt1	0.925767	0.0549428		NHM	A673	0.390727	-0.905648
Tt2	0.712012	-0.298324		UIO	A31835	-0.546392	-0.306047
Tt3	0.935136	-0.0966658		UIO	122.867	-2.14907	0.559011
Tt4	0.691991	0.266313		UIO	A31833	-1.32018	0.938904
Tt5	-0.256427	0.553215		UIO	A31836	-0.99703	-0.639214
Tt6	0.792178	-0.18105		UIO	122.878/.879	-1.43687	0.319589
Tt7	0.84696	0.000327359		MNHN	Unnumbered	-4.53654	1.03813
Tt8	0.731911	-0.383103		MNHN	Unnumbered	-5.2602	0.934206
Tt9	0.858818	0.0968683		MNHN	MAD 6733	0.0201153	-0.554051
Tt10	0.505024	0.50001		MNHN	MAD 395	3.93277	-0.325147
Tt11	0.511274	0.576258		MNHN	[1] 1937-62	6.80993	-0.841366
Tt12	0.768499	-0.150187		MNHN	[3] 1937-62	3.87526	-0.480972
Tt13	0.539607	0.188985		MNHN	[4] 1937-62	5.02617	0.606051
Tt14	0.859263	0.166523		MNHN	1906-16-80	0.0932749	-0.621181
Tt15	0.89854	-0.0818642		MNHN	1906-16-77	-0.28374	-0.963195
Tt16	0.78955	0.0683007		MNHN	1906-16	-2.19965	-1.08277
Tt17	0.671585	0.0308528		MNHN	1906-16-82	-1.41026	-2.30355
Tt18	0.759508	0.0537735		MNHN	1906-16 2	0.580209	0.0880084
Tt19	0.0457821	-0.0186151		MNHN	MAD 674	0.185002	-1.20233
Tt20	0.715799	-0.234703		MNHN	1908-5	7.03835	1.73395
				MNHN	Unnumbered	2.91096	-0.64949
				MNHN	1906-16	-0.499184	-1.41161
				MNHN	MAD 6655	-5.58561	0.657815
				MNHN	MAD 6747	-5.43164	0.756986
				MNHN	MAD 6734	0.746838	-1.09932
				MNHN	MAD 394	5.59754	-0.930718
				MNHN	MAD 393	9.29033	-0.186358
				MNHN	MAD 459b	-5.36271	0.351844
				MNHN	MAD 6744	-4.90847	1.10033
				MNHN	MAD 440a	-4.33531	1.28742
				MNHN	MAD 6653	-4.5768	1.61979
				MNHN	MAD 6741	-0.891605	-1.32863
				MNHN	MAD 6743	-0.125206	-1.54512
				MNHN	Unnumbered	-0.64076	-0.649968
				MNHN	Unnumbered	1.4085	-0.246736
				NHMW	2014/0238/023	1.35322	0.570091
				NHMW	2014/0238/024	-0.296377	-1.25203
				NHM	A237	-0.116251	-0.47849
				NHM	A2143	6.53722	1.36666
				NHM	Unnumbered	1.82909	1.9035
				NHM	A464	-2.42952	-0.464782
				NHM	A506	1.03453	1.31131
				NHM	A4183b	3.72523	1.4973
				NHM	A462	1.91434	2.18863
				NHM	A2144	5.24939	1.86406
				NHM	A438	7.39763	5.81059
				NHM	A673	0.546401	-1.72034
				MFN	MB.AV.70	-3.74718	-0.840103
				CVB	Unnumbered	3.86471	0.390873
				UA	08AEP10	-0.34282	0.165432
				UA	08AEP14	-4.91083	1.65996
				UA	08AEP15	-4.83674	1.25093
				UA	08AEP08	2.84505	-0.0902915
				UA	08AEP18	-4.48665	1.13852
				UA	08AEP09	2.20933	0.193638
				UA	08AEP11	1.25075	-0.0310103
				UA	08AEP06	3.48411	0.022988
				UA	08AEP07	3.1981	-0.0617763
				UA	08AEP16	-3.41376	-0.143505
				UA	Unnumbered	3.42549	-0.695467
				USNM	3016	-0.0466462	1.02139
				ZIUU	A12	-0.146488	-0.0973346
				ZIUU	A49C	-1.05638	-0.904938
				ZIUU	40	-1.2712	-2.27086
				ZIUU	19	-0.172084	-1.11232
				ZIUU	A13	-0.233021	-1.1344
				ZIUU	12	-0.328993	-1.43499
				ZIUU	14	-0.571715	-0.0264938
				ZIUU	A32	0.616177	-0.489119
				ZIUU	A31	0.457561	-0.509999
				OUMNH	4952	-4.36497	1.1333
				OUMNH	4951	5.8994	0.563495
				OUMNH	A676	-7.17947	0.438382
				MNHN	2	-2.35289	1.71774
				MNHN	Unnumbered	-0.434212	-1.0028
				MNHN	Unnumbered	-0.33394	-0.517781
				MNHN	Unnumbered	-0.786841	-0.880882
				MNHN	1906-16	-0.230478	-0.935242
				MNHN	85	-0.117614	-1.0071
				MNHN	Unnumbered	-1.39157	-0.593863
				MNHN	MAD 392	3.59824	-0.850032
				MNHN	MAD 396	1.51449	-1.29016
				MNHN	MAD 6656	-4.85298	1.24615
				MNHN	MAD 6654	-1.86402	0.750566
				MNHN	1906-16, 70	2.44202	-1.26741
				NHMW	2014/0238/007	-0.251007	-0.727904
				NHMW	2014/0238/010	-0.804157	-0.519048
				NHMW	2014/0238/011	-0.245916	1.02449
				NHMW	2014/0238/014	0.128661	-0.75326
				NHMW	2014/0238/018	0.758331	-1.42234
				NHMW	2014/0238/020	-0.091157	-0.734116
				MFN	MB.AV.71	-0.434559	0.846711
				CVB	Unnumbered	-1.67596	0.74675
				UA	08AEP13	-1.07007	0.39756
				UA	Unnumbered	-3.79976	1.32055
F. Unsupervised clusters of tarsometatarsi, <25% missing data
Measurement number	PC1 loadings	PC2 loadings		Museum	Specimen number	PC1 eigenvalues	PC2 eigenvalues
Tmt1	0.854849	0.496661		NHM	A2148	6.9796	0.352204
Tmt2	0.953973	-0.0971579		UIO	122.861	-0.704279	-1.02102
Tmt3	0.969131	-0.176154		MNHN	1906-16-65	4.54151	0.206972
Tmt4	0.973792	-0.0850442		MNHN	Unnumbered	-7.02456	2.18498
Tmt5	0.988525	-0.0646712		MNHN	Unnumbered	-6.63889	1.77392
Tmt6	0.87126	-0.249701		MNHN	Unnumbered	1.37933	0.0129909
Tmt7	0.779477	-0.0570068		MNHN	Unnumbered	-0.234253	-0.244233
Tmt8	0.805223	0.260593		MNHN	1908-5, 51	11.1489	0.7795
Tmt9	0.992254	-0.0440697		MNHN	MAD 6771	-8.39335	2.34184
Tmt10	0.970454	0.0066184		MNHN	MAD 6660	-6.80908	1.67048
Tmt11	0.981327	-0.0592124		MNHN	MAD 6662	-8.65193	1.73057
Tmt12	0.918132	0.175829		MNHN	MAD 6658	-7.63389	1.24833
Tmt13	0.957012	-0.149315		MNHN	MAD 387	4.90532	0.170799
Tmt14	0.975134	-0.047364		MNHN	MAD 385	5.61421	1.10183
Tmt15	0.984391	-0.0136859		MNHN	MAD 6736	1.2708	0.210516
Tmt16	0.977891	-0.14414		MNHN	Unnumbered	4.81029	-0.58532
Tmt17	0.971613	-0.045283		MNHN	1908-21	13.6932	3.15784
Tmt18	0.983807	0.0447412		MNHN	Unnumbered	0.508778	-1.53469
Tmt19	0.988939	0.0514237		MNHN	Unnumbered	-0.69999	-0.459991
Tmt20	0.978394	-0.0302035		MNHN	1908-5	10.8774	0.726854
Tmt21	0.945917	0.0630224		MNHN	MAD 382	13.459	2.14314
Tmt22	0.977734	-0.0626567		MNHN	MAD 400c	-7.91827	1.67752
Tmt23	0.934538	-0.20651		MNHN	MAD 459d	-7.63848	1.91556
Tmt24	0.95602	-0.207068		MNHN	Unnumbered	0.863379	-1.80776
Tmt25	0.93485	-0.160085		NHMW	2014/0238/0025	0.719908	-1.84285
Tmt26	0.945234	0.184148		NHMW	2014/0238/0026	-2.13054	-1.44633
Tmt27	0.93838	0.113272		NHMW	2014/0238/0027	-0.574208	-0.714486
Tmt28	0.955256	0.0925294		NHMW	2014/0238/0029	-2.51613	-0.988787
Tmt29	0.901096	-0.183542		NHMW	2014/0238/0030	-1.84737	-1.1985
Tmt30	0.961602	-0.144943		NHMW	2014/0238/0031	-0.69032	-0.620514
Tmt31	0.978263	-0.00987479		NHM	A673	0.493632	-0.279753
Tmt32	0.75209	-0.216391		MNHN	Unnumbered	-0.574967	-1.29677
Tmt33	0.984007	-0.0351489		MNHN	Unnumbered	-0.990509	-1.59439
Tmt34	0.907943	0.0621592		MFN	MB.AV.67	-4.01751	-1.7106
Tmt35	0.967179	-0.0922432		USNM	A605209	5.48482	0.147189
Tmt36	0.91263	-0.228449		UA	07AEP03	14.5026	1.53923
Tmt37	0.8394	-0.31667		UA	08AEP01	-3.97253	-1.87943
Tmt38	0.957246	-0.140118		UA	07AEP06	-6.83137	1.50826
Tmt39	0.968919	0.00160731		UA	07AEP11	-3.95239	-1.96487
Tmt40	0.986734	-0.0937743		UA	07AEP08	-7.32078	1.15291
Tmt41	0.80448	0.564692		ZIUU	A34	2.52284	-1.07138
Tmt42	0.829241	0.521351		ZIUU	A39	2.6145	-1.76889
Tmt43	0.856762	0.493574		ZIUU	A38	2.00991	-1.69483
Tmt44	0.867438	0.463272		ZIUU	A40	0.894085	-1.55804
				ZIUU	A33a	-1.23334	-1.48338
				NHM	A676	-10.295	1.01338
G. Unsupervised clusters of tarsometatarsi, >25% missing data
Measurement number	PC1 loadings	PC2 loadings		Museum	Specimen number	PC1 eigenvalues	PC2 eigenvalues
Tmt1	0.8217	0.382155		NHM	A2148	5.74968	-0.36182
Tmt2	0.930294	0.0820552		UIO	122.861	-1.49915	-0.799263
Tmt3	0.959593	0.148138		MNHN	1906-16-65	3.51488	-0.995659
Tmt4	0.968204	0.0615229		MNHN	Unnumbered	-7.57082	0.418973
Tmt5	0.985879	0.0668008		MNHN	Unnumbered	-7.23981	0.53891
Tmt6	0.842133	-0.0293212		MNHN	Unnumbered	0.613828	-0.699936
Tmt7	0.770209	-0.274058		MNHN	Unnumbered	-1.0827	0.0395278
Tmt8	0.781259	-0.160291		MNHN	1908-5, 51	9.91715	-0.898598
Tmt9	0.952436	-0.128144		MNHN	MAD 6771	-8.90941	0.781554
Tmt10	0.967527	0.159396		MNHN	MAD 6660	-7.43176	0.682753
Tmt11	0.986008	0.00853618		MNHN	MAD 6662	-9.24081	0.83453
Tmt12	0.916123	0.266941		MNHN	MAD 6658	-8.29377	0.340191
Tmt13	0.963259	0.0400777		MNHN	MAD 387	3.91054	-1.09705
Tmt14	0.95197	-0.25322		MNHN	MAD 385	4.54369	-0.381454
Tmt15	0.958268	-0.24056		MNHN	MAD 6736	0.358686	0.118731
Tmt16	0.981512	-0.0734683		MNHN	1908-21	12.2287	0.279585
Tmt17	0.97348	0.14154		MNHN	Unnumbered	-0.342417	-0.95039
Tmt18	0.980762	0.053231		MNHN	Unnumbered	-1.5077	-0.236839
Tmt19	0.990078	-0.0430875		MNHN	1908-5	9.85492	-1.91285
Tmt20	0.906505	-0.391957		MNHN	MAD 382	11.8743	0.485517
Tmt21	0.832118	-0.49628		MNHN	MAD 400c	-8.4577	0.192236
Tmt22	0.971905	-0.176519		MNHN	MAD 459d	-8.11625	-0.0207728
Tmt23	0.916278	0.266173		MNHN	Unnumbered	-0.55487	-0.697405
Tmt24	0.961649	0.102065		NHMW	2014/0238/0025	-0.162388	-0.987081
Tmt25	0.920383	0.18482		NHMW	2014/0238/0026	-2.84677	-0.910067
Tmt26	0.937881	0.251765		NHMW	2014/0238/0027	-1.34452	-0.764115
Tmt27	0.939853	-0.025491		NHMW	2014/0238/0029	-3.30672	-0.646898
Tmt28	0.959879	0.12136		NHMW	2014/0238/0030	-2.48273	-1.21264
Tmt29	0.923915	0.11544		NHMW	2014/0238/0031	-1.55279	-0.693797
Tmt30	0.96422	-0.0991708		NHM	A673	-0.249362	-1.08827
Tmt31	0.983154	-0.0453273		MNHN	Unnumbered	-1.3762	-1.00629
Tmt32	0.579419	0.689605		MNHN	Unnumbered	-1.76805	-1.07392
Tmt33	0.930763	-0.326272		MFN	MB.AV.67	-4.75507	-0.891092
Tmt34	0.55481	0.785486		USNM	A605209	4.31859	-0.506148
Tmt35	0.891713	-0.331214		UA	07AEP03	13.0065	-3.51884
Tmt36	0.915521	-0.0849253		UA	08AEP01	-4.50762	-1.18792
Tmt37	0.778073	-0.299619		UA	07AEP06	-7.40561	0.492896
Tmt38	0.933151	-0.284717		UA	07AEP11	-4.66504	-0.861567
Tmt39	0.959488	-0.177479		UA	07AEP08	-7.83076	0.41307
Tmt40	0.966174	-0.179589		ZIUU	A34	1.66003	-0.510374
Tmt41	0.828099	0.0837194		ZIUU	A39	1.72694	-0.298861
Tmt42	0.832524	0.260783		ZIUU	A38	0.995546	0.0147667
Tmt43	0.867918	0.139071		ZIUU	A40	0.112735	0.0539399
Tmt44	0.871232	0.212502		ZIUU	A33a	-2.02109	-0.594744
				NHM	A676	-10.7855	-0.940318
				MNHN	MAD 6770	5.23105	0.652445
				MNHN	MAD 383	7.53783	3.01697
				MNHN	MAD 6659	-8.94043	1.44432
				MNHN	MAD 6772	-0.214046	-4.78605e-05
				MNHN	MAD 384	-2.43887	-0.64147
				MNHN	MAD 388	0.191074	1.88774
				MNHN	MAD 8813	10.7068	4.53021
				NHMW	2014/0238/0028	-2.70779	0.167059
				NHMW	2014/0238/0032	-7.18191	6.12974
				NHMW	2014/0238/0033	8.21237	8.90557
				NHMW	2014/0238/0034	-0.0305347	-0.339025
				NHMW	2014/0238/0035	-2.016	0.695478
				NHMW	2014/0238/0036	1.44346	-0.183059
				UA	07AEP04	9.95053	-1.1554
				UA	08AEP13	11.6398	-0.283874
				UA	07AEP12	2.65955	0.683679
				UA	07AEP07	-6.38937	-0.683336
				UA	07AEP05	3.77042	-0.949417
				UA	Unnumbered	3.87391	-0.100659
				USNM	214709	-7.8552	-1.31702
				USNM	214713	5.85904	-2.12629
				ZIUU	"13"	0.401524	-0.552254
				ZIUU	A36	0.824055	0.0689719
				ZIUU	"17"	-0.683999	0.989777
				ZIUU	A47	9.07741	0.217708
