# Supplementary material for: Unexpected diversity within the extinct elephant birds (Aves: Aepyornithidae) and a new identity for the world's largest bird
Source: R Soc Open Sci. 2018 Sep 26;5(9):181295. doi: 10.1098/rsos.181295 (PMC6170582; doi:10.1098/rsos.181295)
Supplement: TABLE S3. PCA LOADINGS AND EIGENVALUES FOR LOG-TRANSFORMED MORPHOMETRIC ANALYSES [file rsos181295supp3.xlsx]

## Sheet: Sheet 1
TABLE S3. PCA LOADINGS AND EIGENVALUES FOR LOG-TRANSFORMED MORPHOMETRIC ANALYSES
A. Unsupervised clusters of log-transformed femora, <25% missing data
Measurement number	PC1 loadings	PC2 loadings		Museum	Specimen number	PC1 eigenvalues	PC2 eigenvalues
F1	0.984907	0.0474168		CVB	Unnumbered	6.56344	0.643145
F2	0.958163	-0.033192		MNHN	1906-16-66	0.297604	0.288593
F3	0.983411	-0.0341258		MNHN	Unnumbered	0.648973	0.282543
F4	0.965368	-0.0405027		MNHN	1908-5	-7.49594	0.38157
F5	0.97925	-0.0100529		MNHN	MAD 364	5.75424	-0.440311
F6	0.977159	-0.0485584		MNHN	MAD 6648	-7.96667	0.0189098
F7	0.982054	-0.0474091		MNHN	MAD 441	-7.33951	1.20971
F8	0.948952	-0.0473755		MNHN	MAD 373	-0.859736	-1.04654
F9	0.956586	0.111545		MNHN	MAD 374	-1.49333	0.441034
F10	0.985881	-0.0240647		MNHN	MAD 369	6.57011	-0.520641
F11	0.981964	0.0106033		MNHN	MAD 6754	-0.497111	0.272756
F12	0.973311	0.00283014		MNHN	1906-16-58	1.36332	0.253109
F13	0.970406	0.0263177		MNHN	1906-16-71	-0.411185	0.287276
F14	0.961331	0.0114813		MNHN	1906-16-65	-0.957271	-1.04235
F15	0.96653	-0.0177283		MNHN	Unnumbered	-0.502462	-0.72981
F16	0.960964	-0.0348565		MNHN	Unnumbered	-6.77561	0.412368
F17	0.939261	-0.104056		MNHN	Unnumbered	4.47897	0.576096
F18	0.934875	0.0853734		MNHN	Unnumbered	0.254075	-0.122855
F19	0.814574	0.505692		MNHN	Unnumbered	0.21324	0.676541
F20	0.859065	-0.313736		MNHN	Unnumbered	-8.38311	-0.0336557
				MNHN	MAD 378	1.9306	0.00253146
				MNHN	Unnumbered	6.54683	0.534113
				MNHN	Unnumbered	7.13117	1.0323
				MNHN	MAD 6773	-6.68301	0.132182
				MNHN	Unnumbered	0.141784	-0.312866
				MNHN	Unnumbered	-0.0835726	0.170769
				NHMUK	Unnumbered	1.19767	0.32832
				NHMUK	A2142	5.79384	-0.10489
				NHMUK	ii.26.1254	-1.77901	-0.167304
				NHMUK	Unnumbered	-1.59784	-1.17263
				NHMUK	A696	0.168878	0.626231
				NHMUK	A2141	6.6111	0.391939
				NHMUK	A465	-1.21845	-1.5809
				NHMUK	A439	6.0421	-0.41193
				NHMW	2014/0238/039	-0.0443425	-0.153428
				NHMW	2014/0238/041	0.604444	-0.153439
				NHMW	2014/0238/042	-0.848117	-1.33765
				NHMW	2014/0238/045	-1.92317	-0.588913
				OUMNH	4950	6.77224	0.95474
				UA	07AEP02	-7.09667	0.488963
				UA	Unnumbered	2.50681	0.349984
				UA	Unnumbered	-7.71005	0.765509
				UIO	Unnumbered	1.69725	0.375354
				UIO	122.872	-0.0605403	-0.202264
				USNM	3013	0.102484	-1.05445
				ZIUU	A49b	2.29277	-0.831073
				ZIUU	A15	-0.251671	-0.276204
				ZIUU	A49f	-0.311073	0.387528
B. Unsupervised clusters of log-transformed tibiotarsi, <25% missing data
Measurement number	PC1 loadings	PC2 loadings		Museum	Specimen number	PC1 eigenvalues	PC2 eigenvalues
Tt1	0.937844	0.0573547		CVB	Unnumbered	3.20064	0.542083
Tt2	0.728015	-0.256692		MFN	MB.AV.70	-3.83256	-1.14298
Tt3	0.980886	-0.0223038		MNHN	Unnumbered	-4.4887	1.67903
Tt4	0.530812	0.326649		MNHN	Unnumbered	-5.47423	1.24105
Tt5	-0.215559	0.591989		MNHN	MAD 6733	-0.0235418	0.791728
Tt6	0.84516	-0.0705627		MNHN	MAD 395	3.4138	0.123239
Tt7	0.805832	-0.103469		MNHN	[1] 1937-62	5.47301	-0.140633
Tt8	0.688148	-0.367171		MNHN	[3] 1937-62	3.32414	-0.162777
Tt9	0.860797	0.132633		MNHN	[4] 1937-62	4.38406	1.18445
Tt10	0.516	0.523876		MNHN	1906-16-80	0.404796	-1.48295
Tt11	0.462238	0.588346		MNHN	1906-16-77	-0.0820597	-1.10002
Tt12	0.803143	-0.155366		MNHN	1906-16	-1.95031	-0.934696
Tt13	0.740604	0.102352		MNHN	1906-16-82	-1.11381	-1.6315
Tt14	0.879562	0.0200673		MNHN	1906-16 2	0.935434	0.742483
Tt16	0.921606	-0.0580941		MNHN	MAD 674	0.426745	-1.39281
Tt17	0.887657	0.00744497		MNHN	1908-5	6.40167	0.682888
Tt18	0.774757	-0.155793		MNHN	Unnumbered	2.54267	-0.0242931
Tt19	0.790332	-0.0208253		MNHN	1906-16	-0.208363	-1.31014
Tt20	0.243187	0.262516		MNHN	MAD 6655	-5.846	0.900281
				MNHN	MAD 6747	-5.58592	0.888295
				MNHN	MAD 6734	0.995984	-0.846671
				MNHN	MAD 394	4.5834	-0.4652
				MNHN	MAD 393	7.08934	-1.29359
				MNHN	MAD 459b	-5.52049	0.504457
				MNHN	MAD 6744	-4.93145	1.07423
				MNHN	MAD 440a	-4.22469	1.30406
				MNHN	MAD 6653	-4.60501	1.47417
				MNHN	MAD 6741	-0.580678	-1.66492
				MNHN	MAD 6743	0.157872	-1.34065
				MNHN	Unnumbered	-0.349193	-0.569706
				MNHN	Unnumbered	1.72293	1.47661
				NHMUK	A673	-0.507502	-0.368803
				NHMUK	A237	0.0688557	-1.48976
				NHMUK	A2143	4.94496	1.25561
				NHMUK	Unnumbered	1.66865	0.71777
				NHMUK	A464	-2.24746	-0.962854
				NHMUK	A506	0.956523	1.13577
				NHMUK	A4183b	3.036	1.41071
				NHMUK	A462	1.70497	1.74015
				NHMUK	A2144	4.12418	1.57049
				NHMUK	A438	5.62486	4.19279
				NHMUK	A673	0.621061	-1.74169
				NHMW	2014/0238/023	1.06	-0.293352
				NHMW	2014/0238/024	-0.475446	-1.9597
				OUMNH	4952	-4.32468	0.945067
				OUMNH	4951	4.7384	1.34319
				OUMNH	A676	-8.23352	0.559757
				UA	08AEP10	0.00744561	-0.0564731
				UA	08AEP14	-5.18025	1.63438
				UA	08AEP15	-4.97153	1.13871
				UA	08AEP08	2.40608	-0.00201702
				UA	08AEP18	-4.83873	0.101549
				UA	08AEP09	2.09294	0.0890045
				UA	08AEP11	1.21165	0.144241
				UA	08AEP06	3.33246	0.666466
				UA	08AEP07	2.93616	0.0162169
				UA	08AEP16	-3.26235	-0.462821
				UA	Unnumbered	3.03995	-0.634482
				UIO	A31835	-0.4728	-0.611727
				UIO	122.867	-1.90544	0.1207
				UIO	A31833	-1.05015	1.00624
				UIO	A31836	-0.901887	-0.933282
				UIO	122.878/.879	-1.33014	-0.100486
				USNM	3016	-0.0369164	0.959996
				ZIUU	A12	0.0663982	-0.142602
				ZIUU	A49C	-0.889309	-0.884451
				ZIUU	40	-0.889768	-3.35306
				ZIUU	19	0.169934	-1.62766
				ZIUU	A13	0.0938372	-1.3614
				ZIUU	12	0.00271369	-1.50369
				ZIUU	14	-0.195561	-0.310174
				ZIUU	A32	0.83557	-0.579843
				ZIUU	A31	0.730409	-0.47401
B. Unsupervised clusters of log-transformed tarsometatarsi, <25% missing data
Measurement number	PC1 loadings	PC2 loadings		Museum	Specimen number	PC1 eigenvalues	PC2 eigenvalues
Tmt1	0.788383	0.596682		MFN	MB.AV.67	-3.54768	-2.48227
Tmt2	0.959443	-0.099568		MNHN	1906-16-65	4.94481	0.41728
Tmt3	0.964006	-0.205017		MNHN	Unnumbered	-7.55651	2.29999
Tmt4	0.976896	-0.0678296		MNHN	Unnumbered	-6.98434	1.82449
Tmt5	0.987428	-0.0830506		MNHN	Unnumbered	2.08819	0.0729805
Tmt6	0.876977	-0.213456		MNHN	Unnumbered	0.556359	-0.31986
Tmt7	0.828503	-0.0188412		MNHN	1908-5, 51	10.0146	1.46749
Tmt8	0.732255	0.276916		MNHN	MAD 6771	-9.59858	2.61387
Tmt9	0.991628	-0.0696408		MNHN	MAD 6660	-7.21498	1.7471
Tmt10	0.972528	0.00707122		MNHN	MAD 6662	-9.88709	1.91475
Tmt11	0.981163	-0.070925		MNHN	MAD 6658	-8.3009	1.1277
Tmt12	0.913432	0.197297		MNHN	MAD 387	5.24106	0.485006
Tmt13	0.958471	-0.142577		MNHN	MAD 385	5.8604	1.28429
Tmt14	0.975054	-0.106013		MNHN	MAD 6736	1.98978	0.298061
Tmt15	0.984464	-0.0749557		MNHN	Unnumbered	5.16725	-0.358796
Tmt16	0.972277	-0.172254		MNHN	1908-21	11.749	3.25066
Tmt17	0.982419	-0.049789		MNHN	Unnumbered	1.23985	-1.5516
Tmt18	0.985116	0.0285697		MNHN	Unnumbered	0.100078	-0.636671
Tmt19	0.988624	0.0266836		MNHN	1908-5	9.82764	1.37241
Tmt20	0.978512	-0.0525966		MNHN	MAD 382	11.6362	2.63451
Tmt21	0.971539	0.021467		MNHN	MAD 400c	-8.78499	1.66432
Tmt22	0.978849	-0.082216		MNHN	MAD 459d	-8.48414	2.008
Tmt23	0.942536	-0.210755		MNHN	Unnumbered	1.57801	-1.83876
Tmt24	0.95945	-0.20302		MNHN	Unnumbered	0.158281	-1.52967
Tmt25	0.945078	-0.148469		MNHN	Unnumbered	-0.344936	-1.90509
Tmt26	0.933601	0.22027		NHMUK	A2148	6.87628	0.808121
Tmt27	0.929055	0.123586		NHMUK	A673	1.13278	-0.28716
Tmt28	0.945367	0.0820626		NHMUK	A676	-12.4304	0.855184
Tmt29	0.928399	-0.164794		NHMW	2014/0238/0025	1.42969	-1.96928
Tmt30	0.965655	-0.146911		NHMW	2014/0238/0026	-1.43207	-1.87421
Tmt31	0.980485	0.000398611		NHMW	2014/0238/0027	0.157775	-0.900155
Tmt32	0.778336	-0.16875		NHMW	2014/0238/0029	-1.85708	-1.46717
Tmt33	0.984924	-0.0706991		NHMW	2014/0238/0030	-1.14488	-1.65563
Tmt34	0.87231	0.0510127		NHMW	2014/0238/0031	0.0806852	-0.757597
Tmt35	0.9632	-0.109174		UA	07AEP03	12.2299	2.21046
Tmt36	0.910089	-0.241269		UA	08AEP01	-3.60743	-2.58014
Tmt37	0.860309	-0.311991		UA	07AEP06	-7.24345	1.47065
Tmt38	0.966345	-0.106745		UA	07AEP11	-3.49439	-2.66271
Tmt39	0.977535	0.0053664		UA	07AEP08	-7.88977	0.994857
Tmt40	0.988182	-0.0902744		UIO	122.861	0.0544038	-1.24844
Tmt41	0.711809	0.668206		USNM	A605209	5.72161	0.392104
Tmt42	0.74741	0.632118		ZIUU	A34	3.14269	-0.903727
Tmt43	0.786723	0.600346		ZIUU	A39	3.15914	-1.44763
Tmt44	0.802865	0.567837		ZIUU	A38	2.61774	-1.45796
				ZIUU	A40	1.58635	-1.52289
				ZIUU	A33a	-0.536972	-1.85688
